# Supplementary material for: FORGEdb: a tool for identifying candidate functional variants and uncovering target genes and mechanisms for complex diseases
Source: PubMed Central journal article supplement (PMC10763681; doi:10.1186/s13059-023-03126-1), 2024-01-02

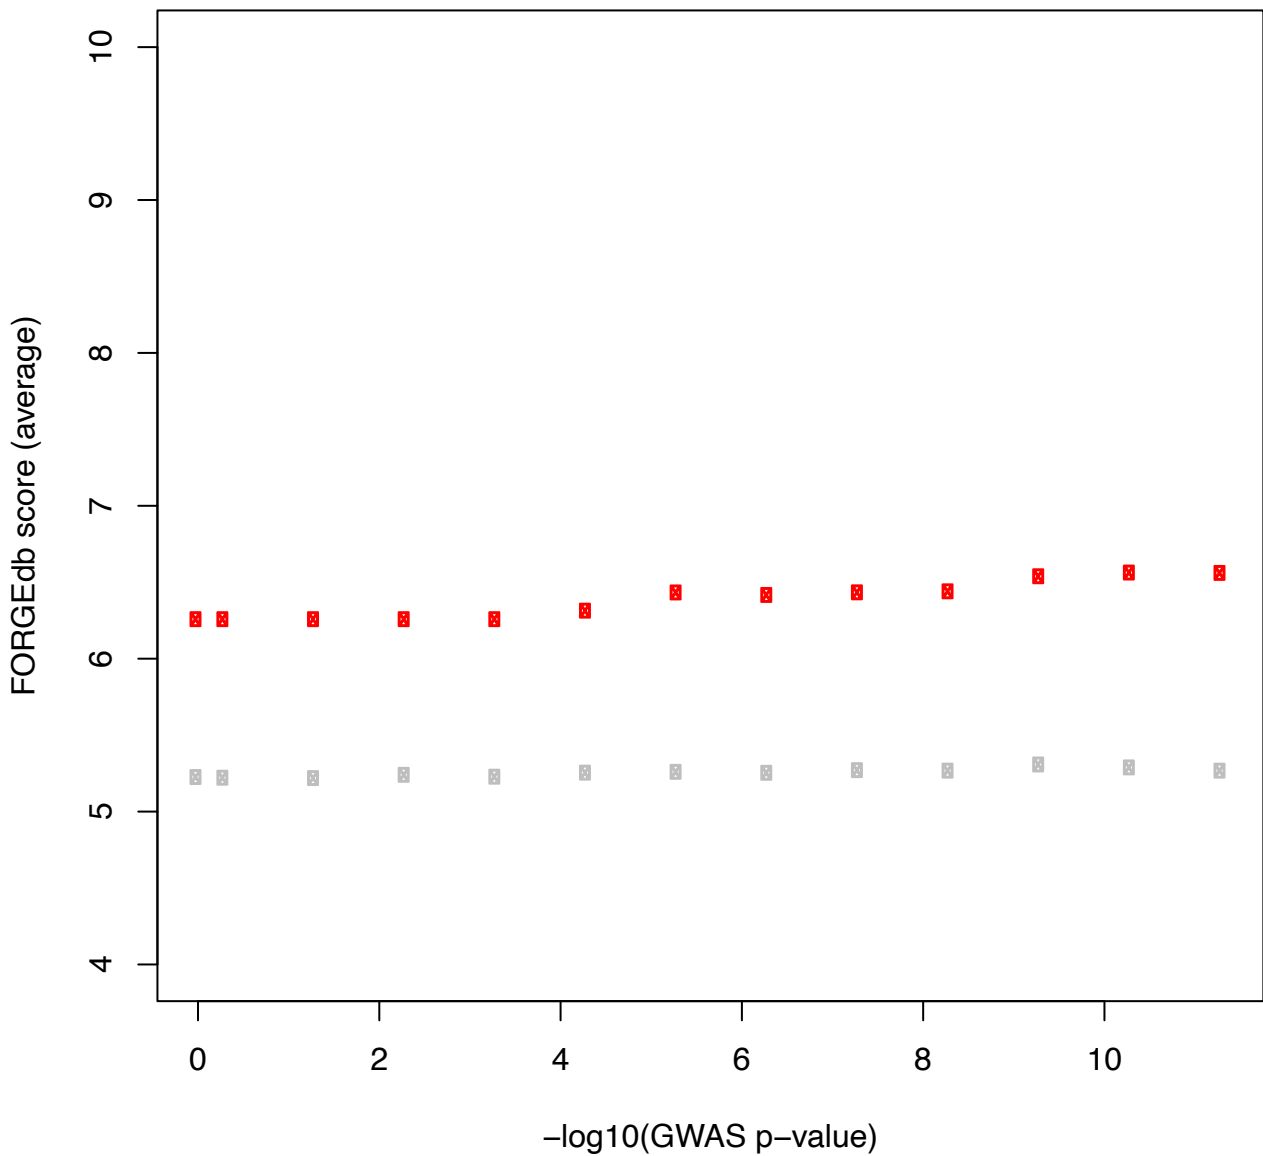

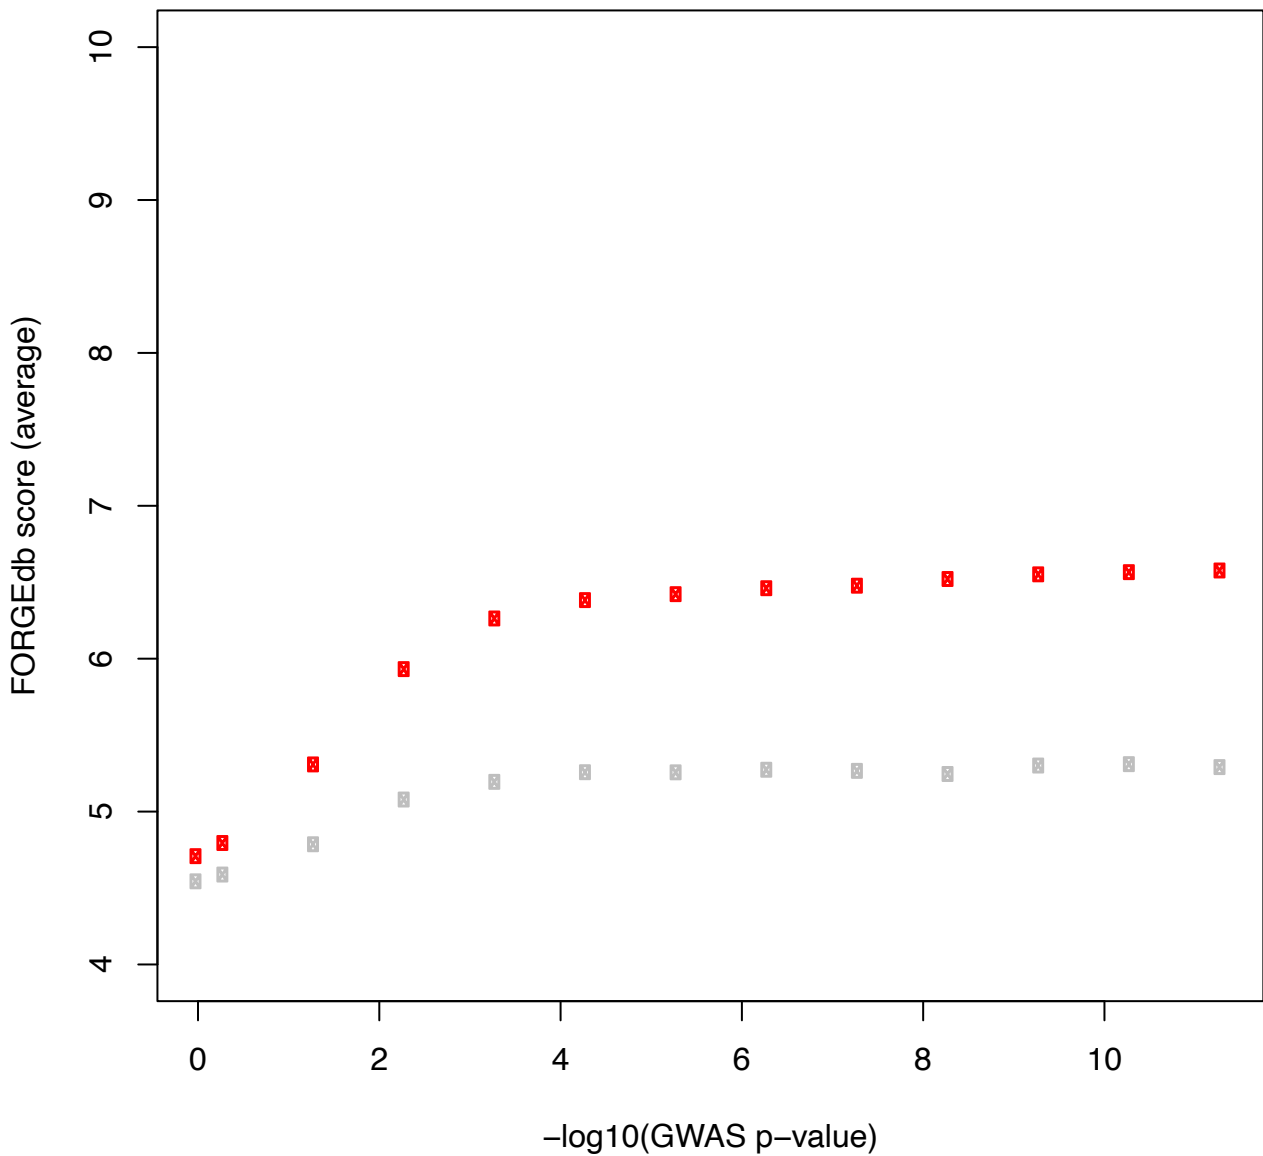

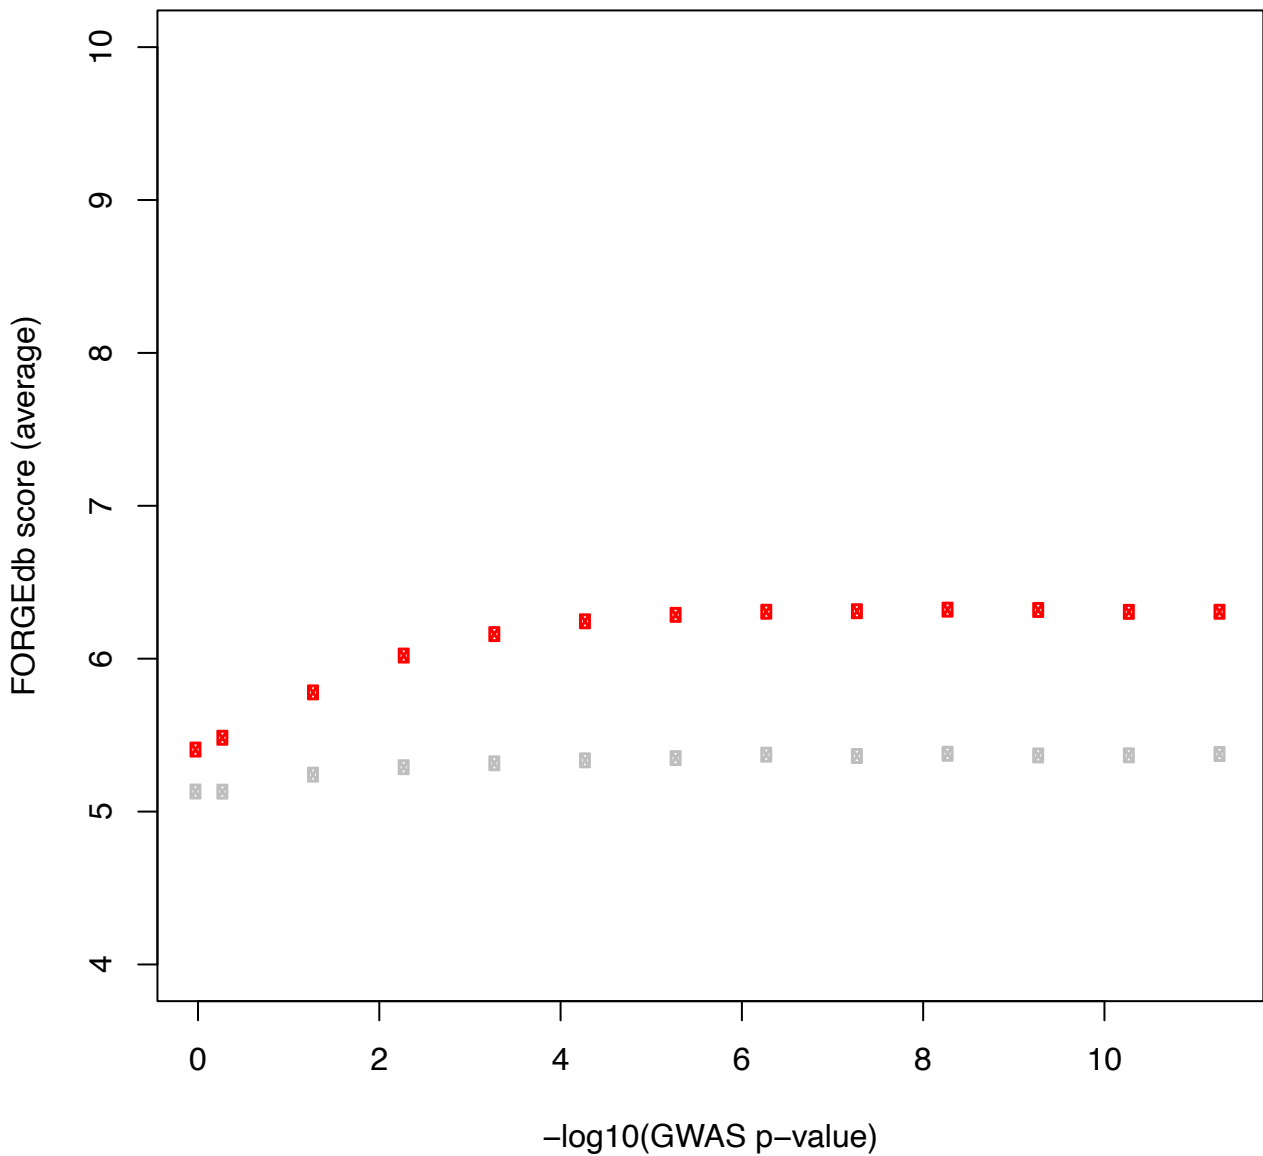

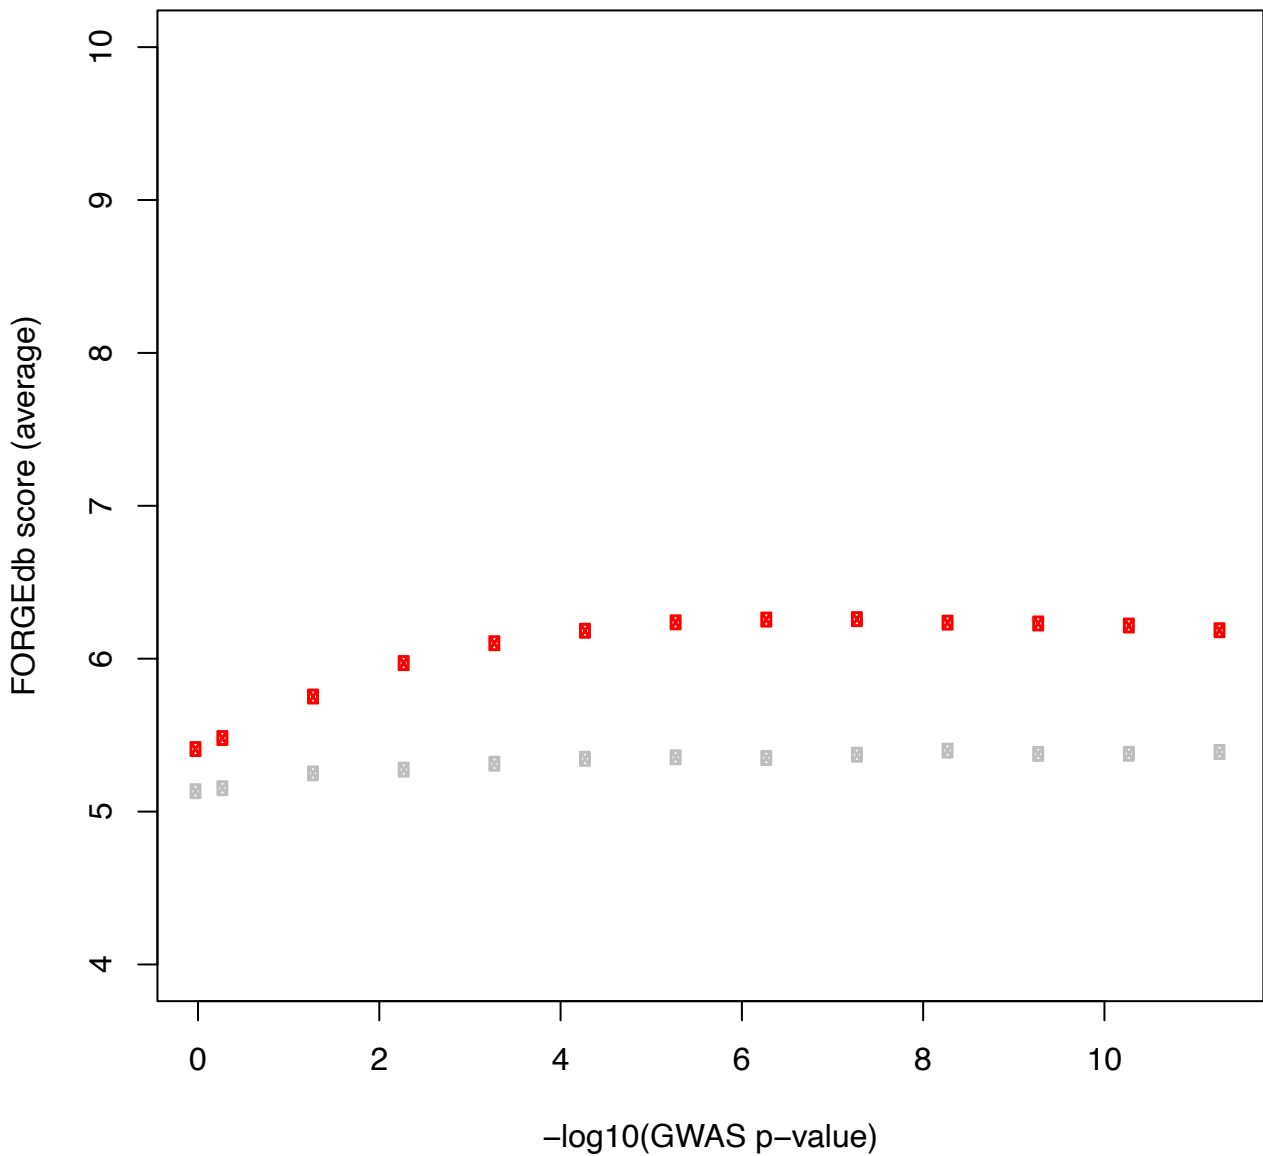

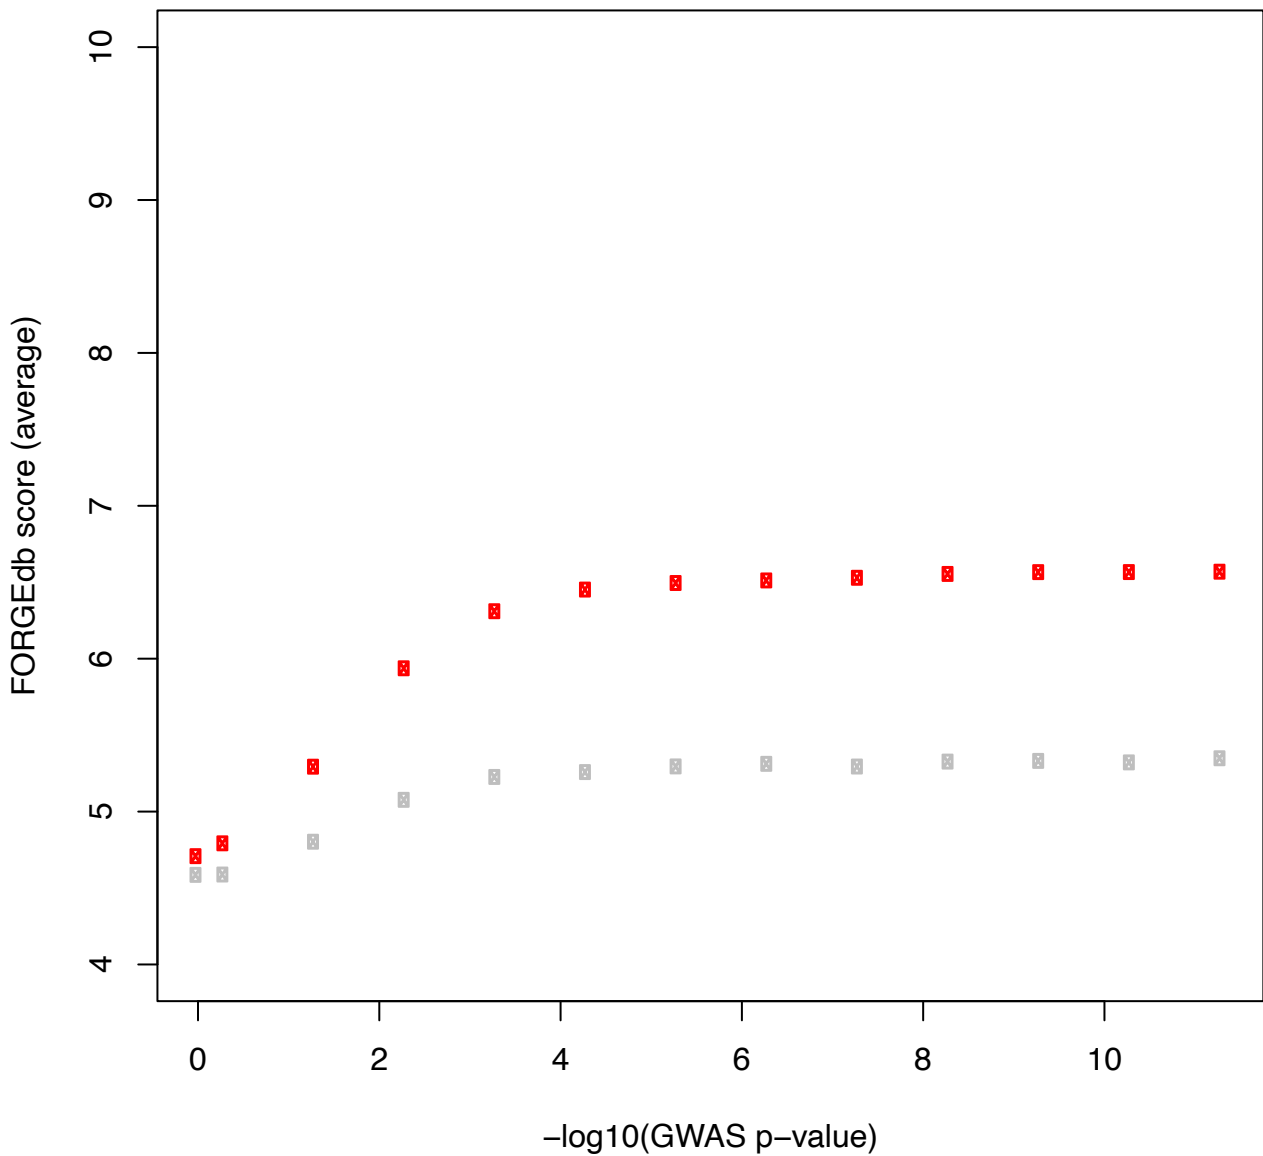

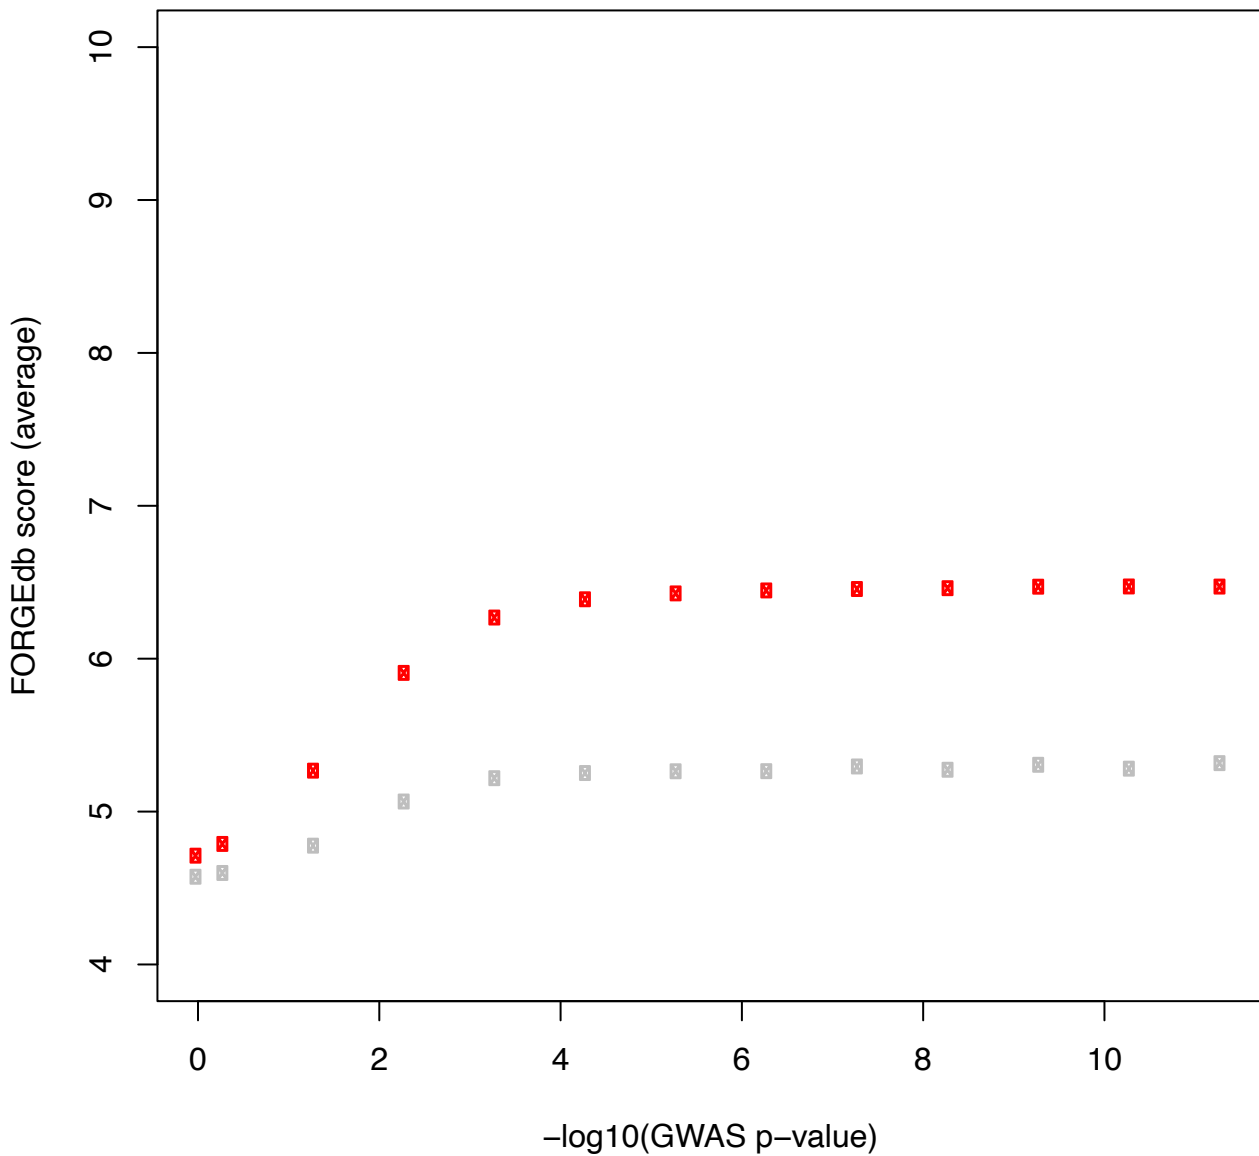

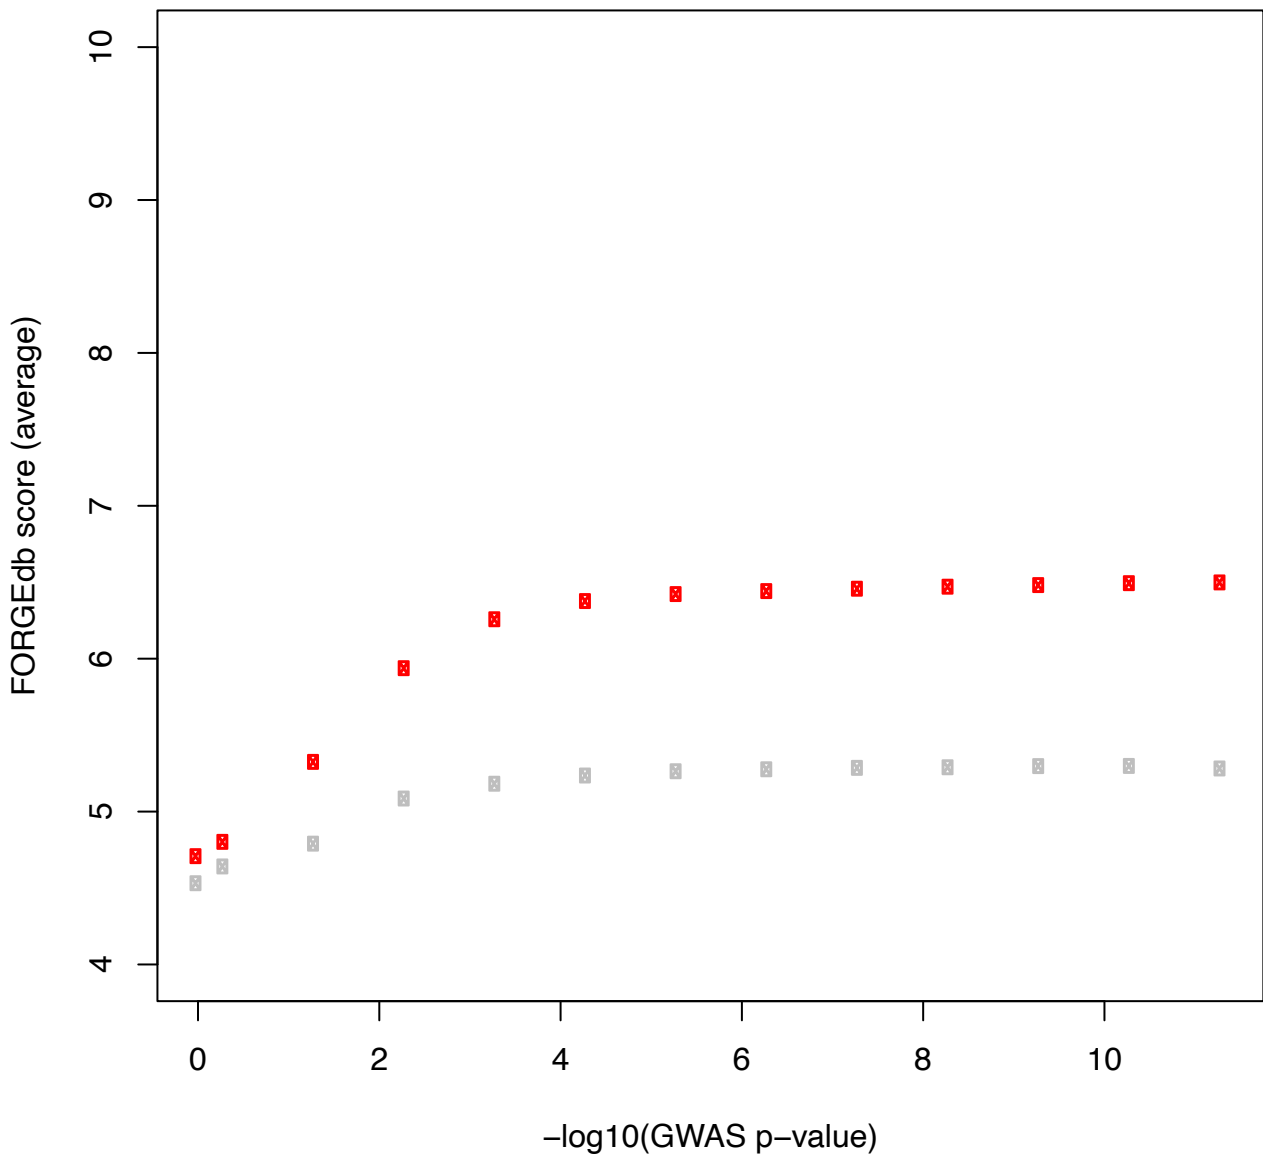

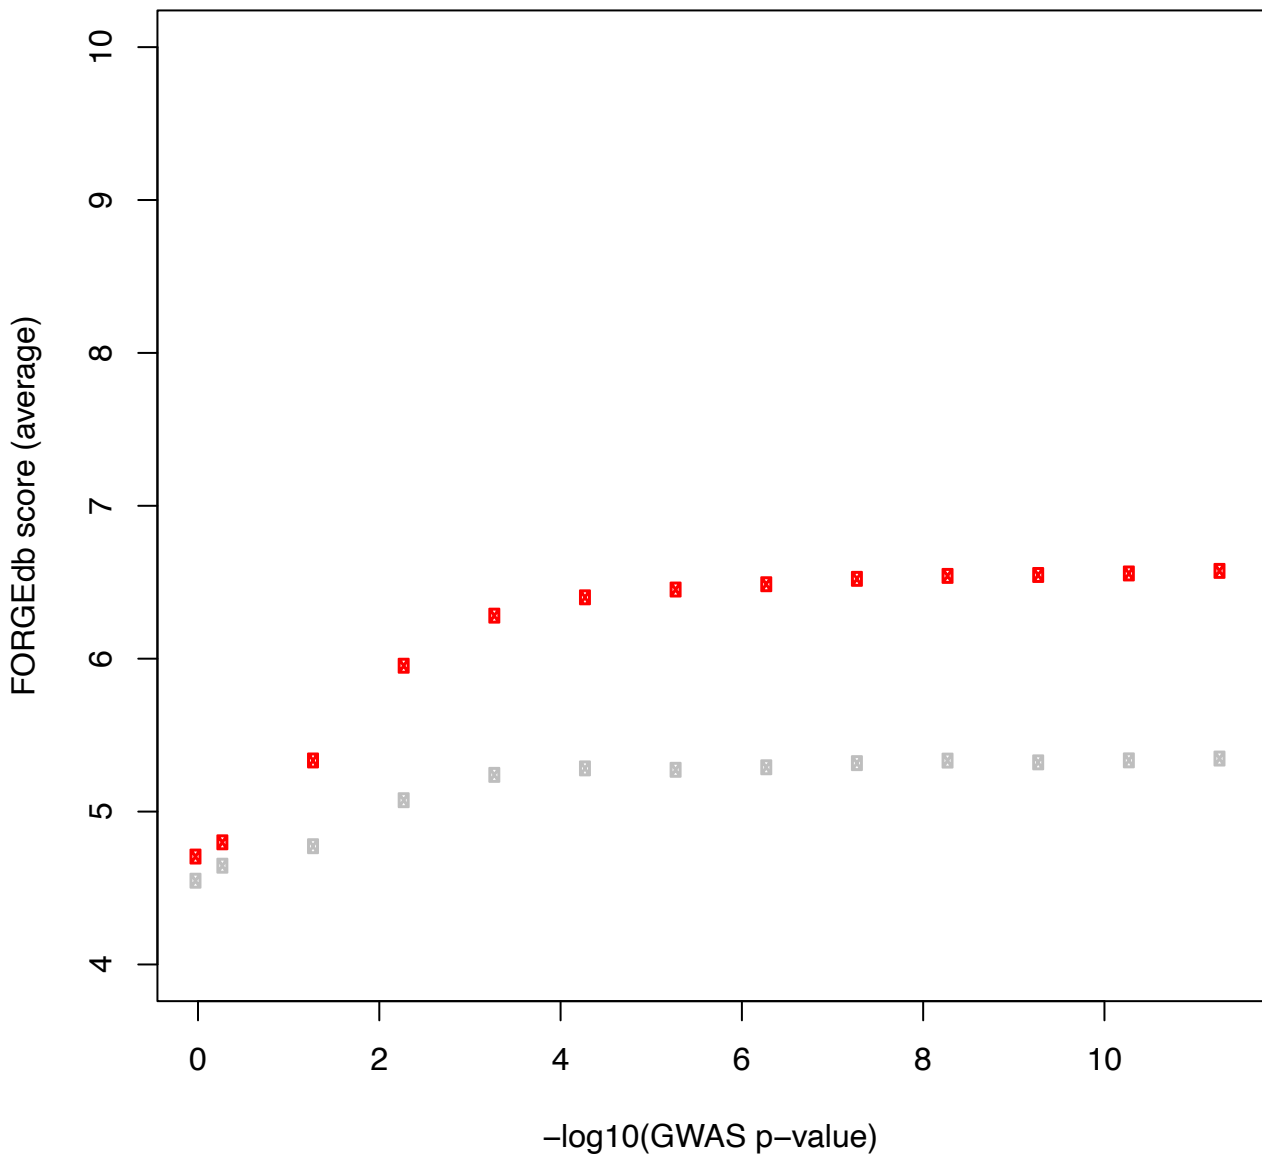



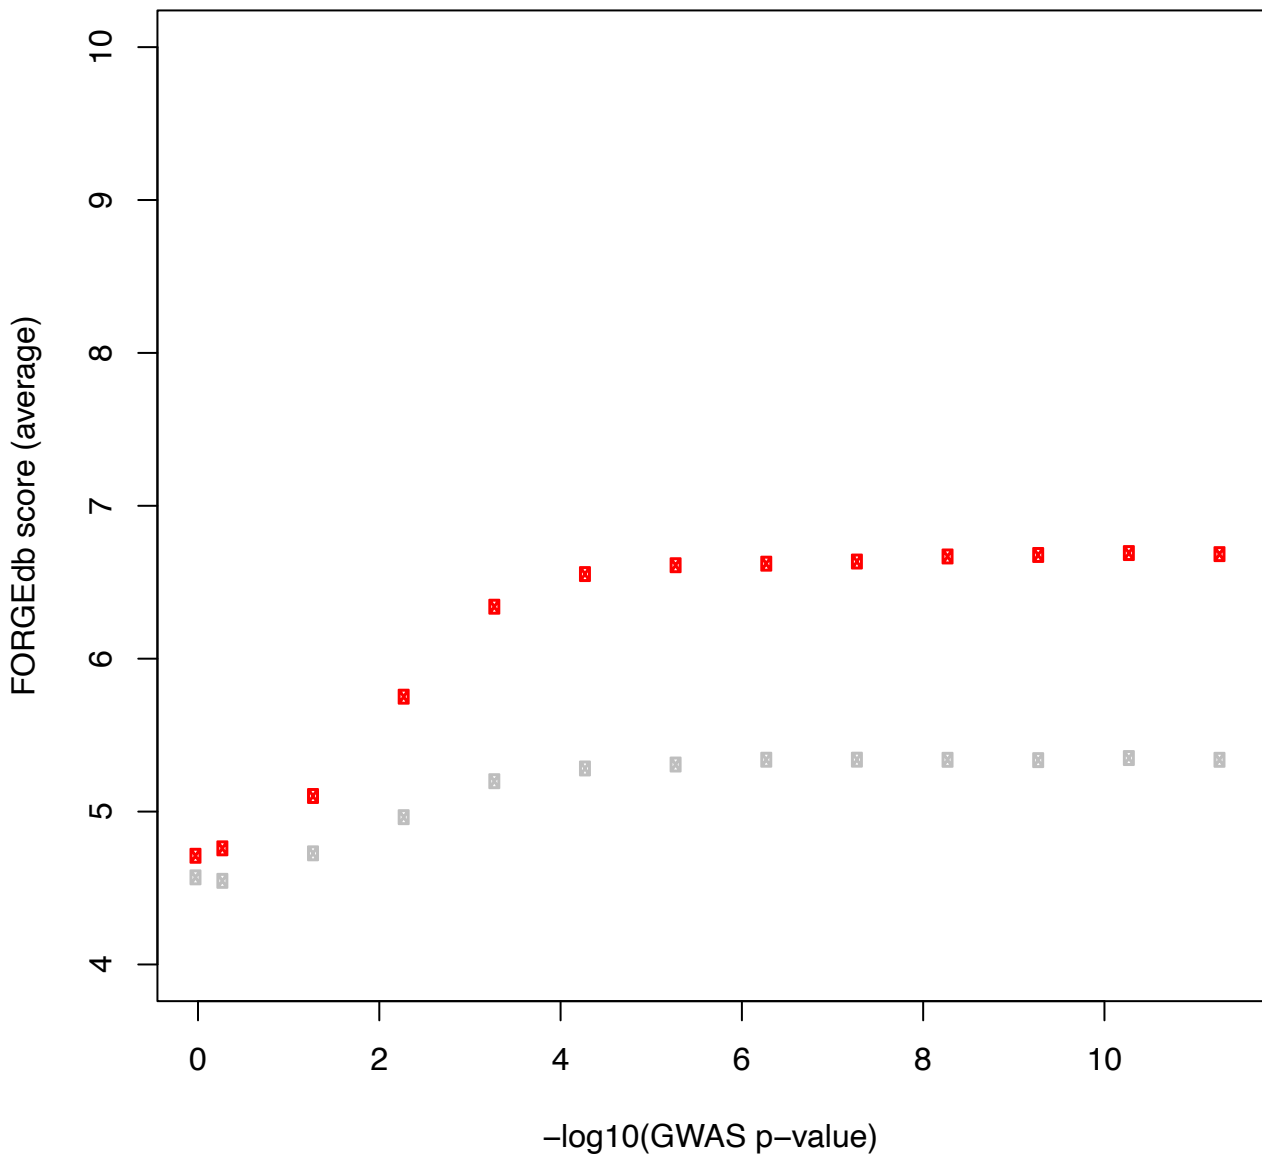

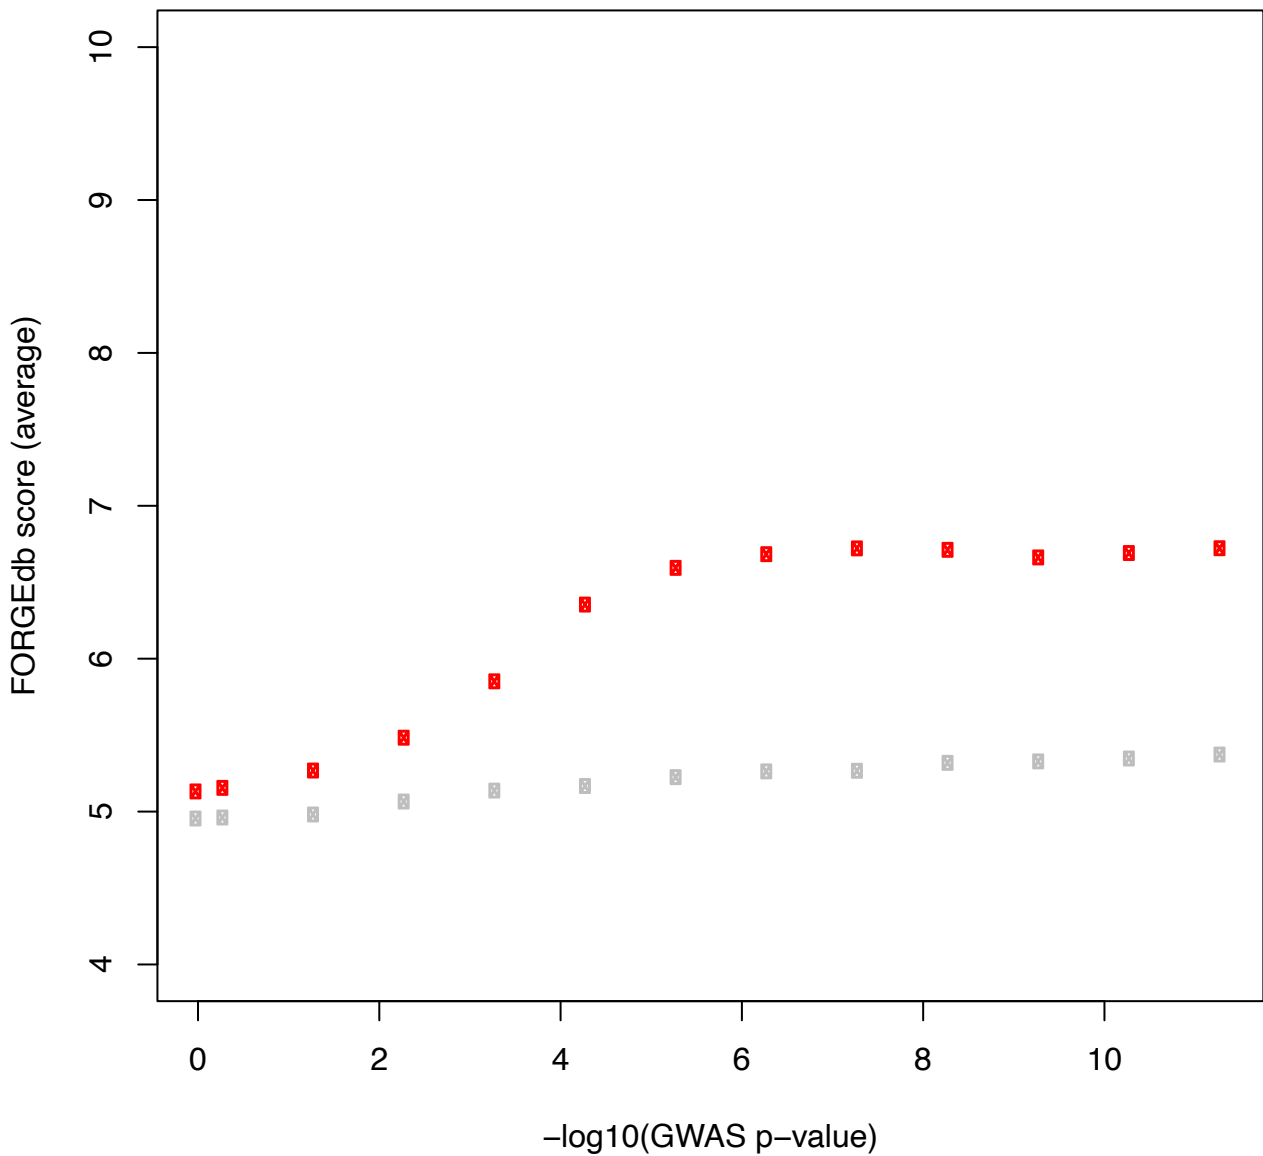

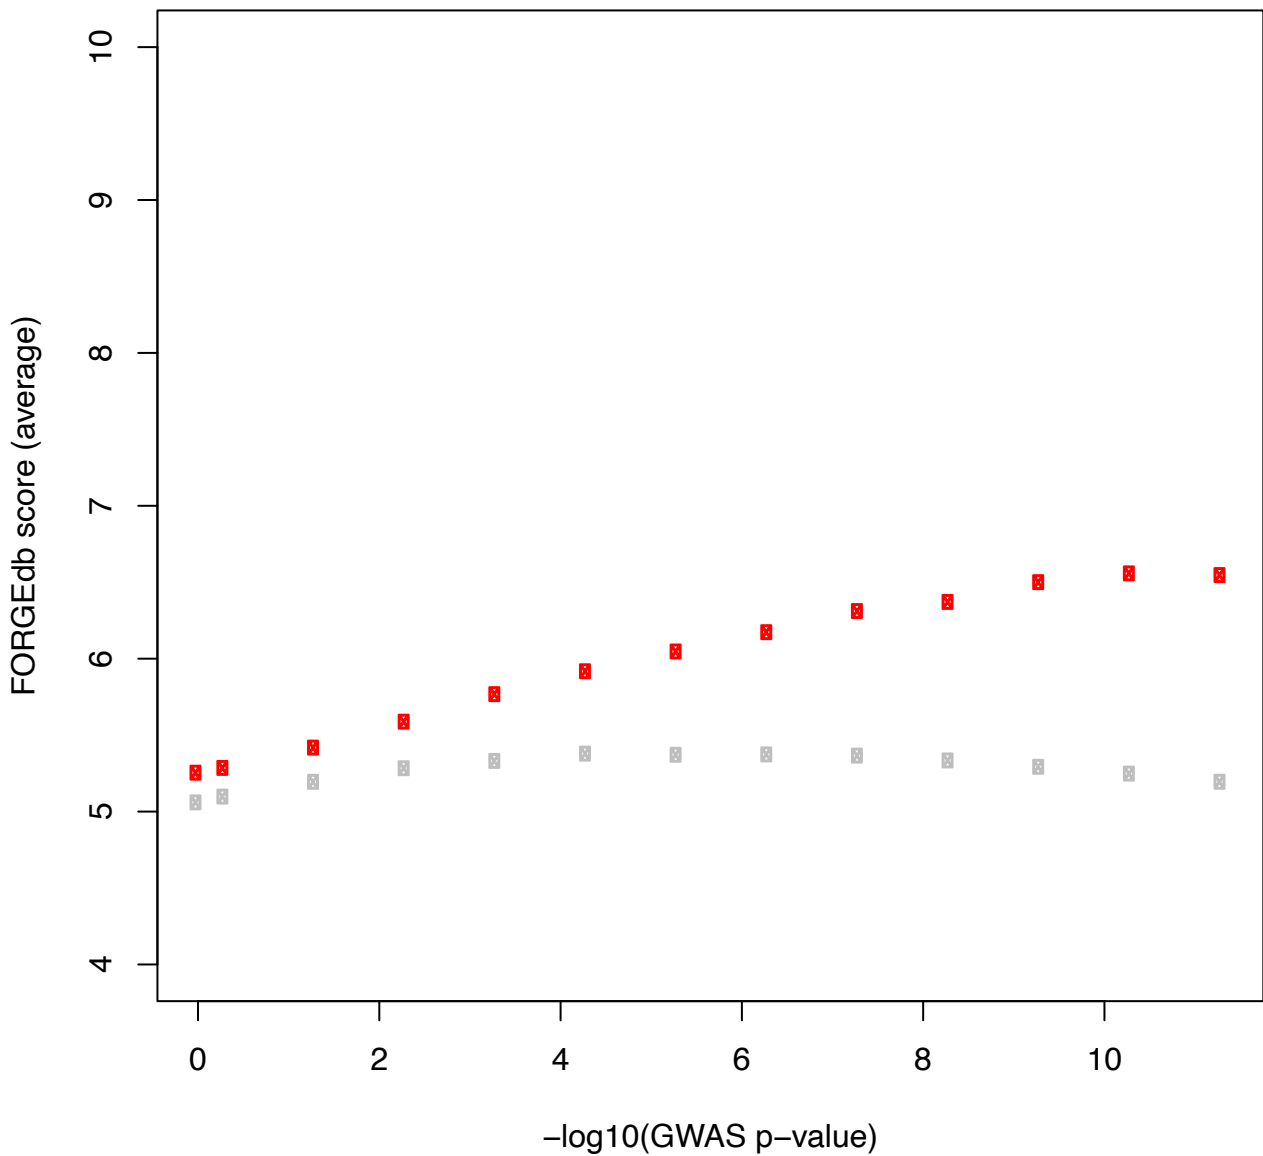

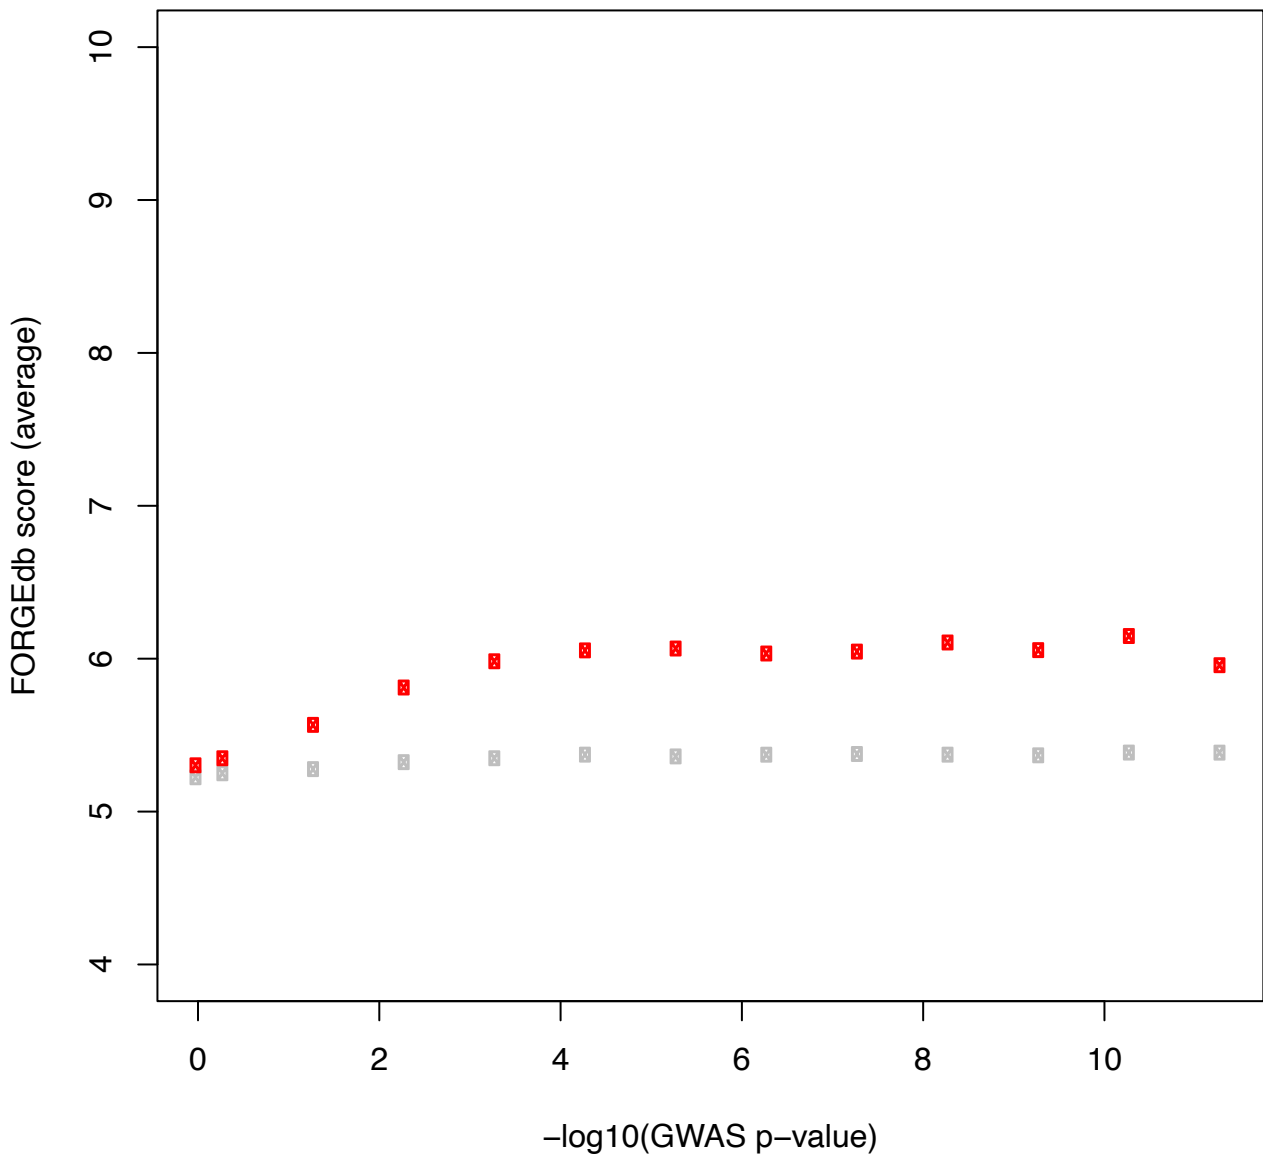

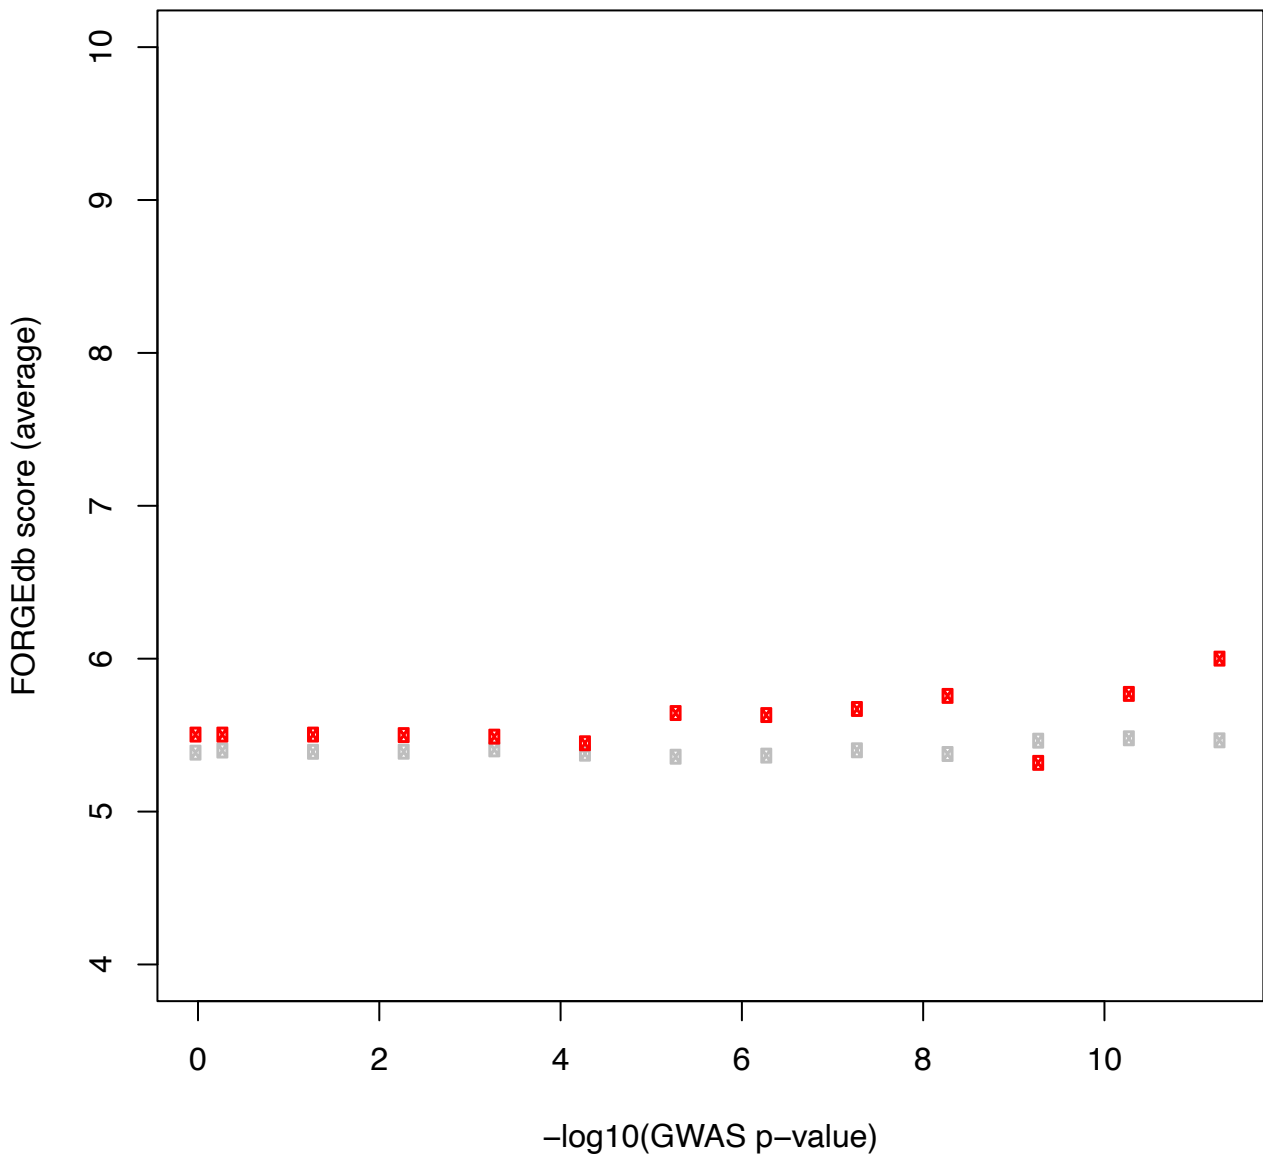

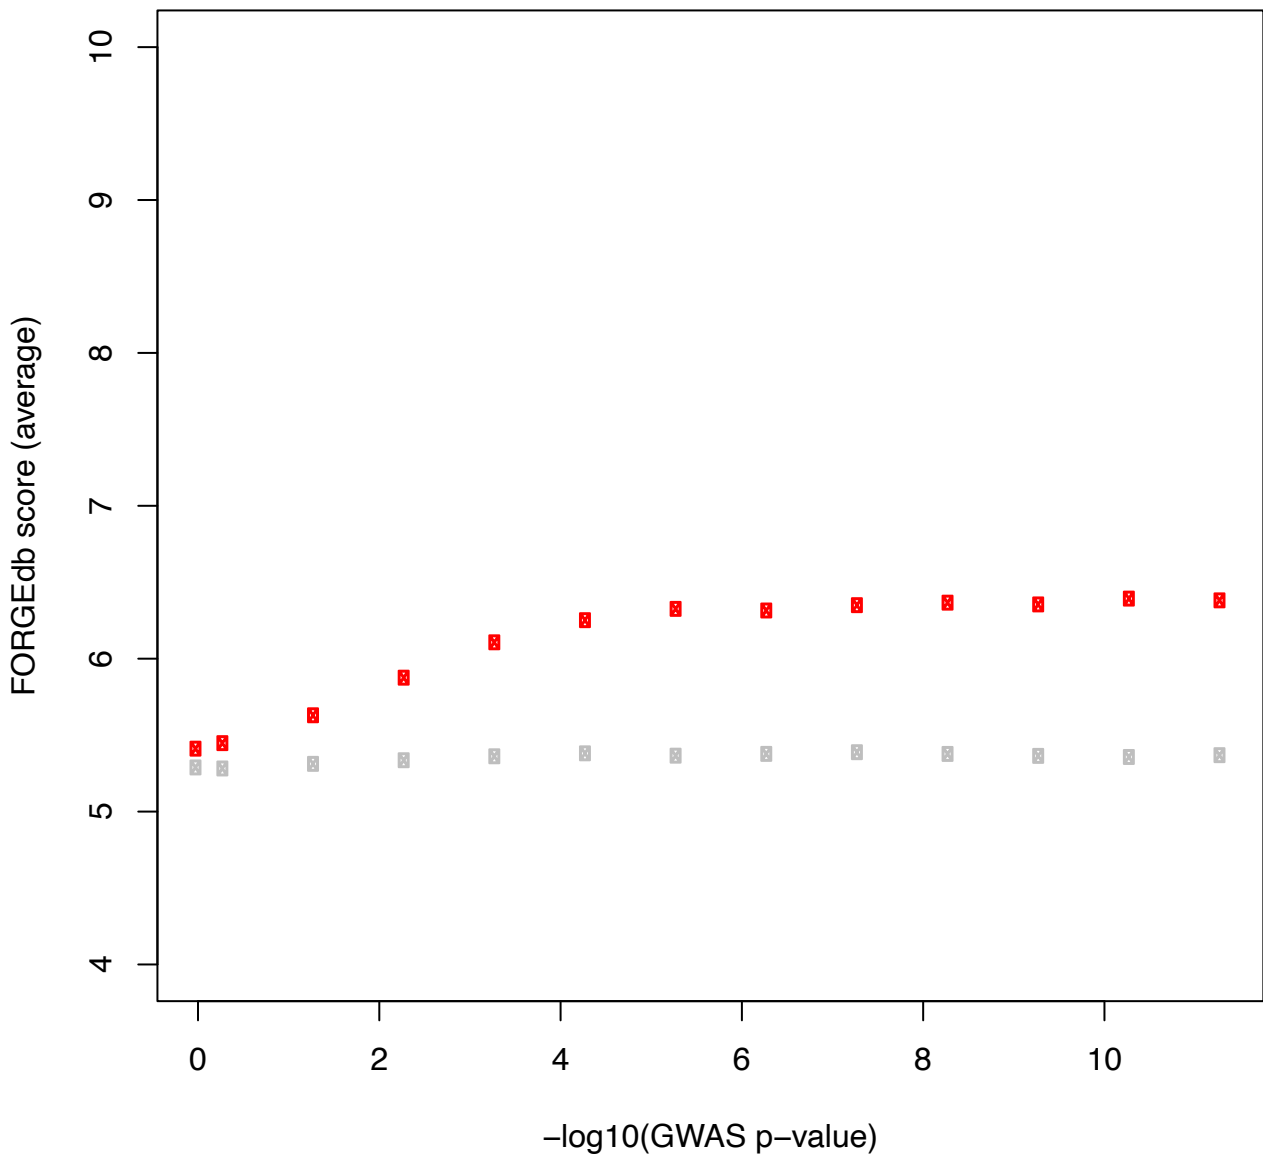

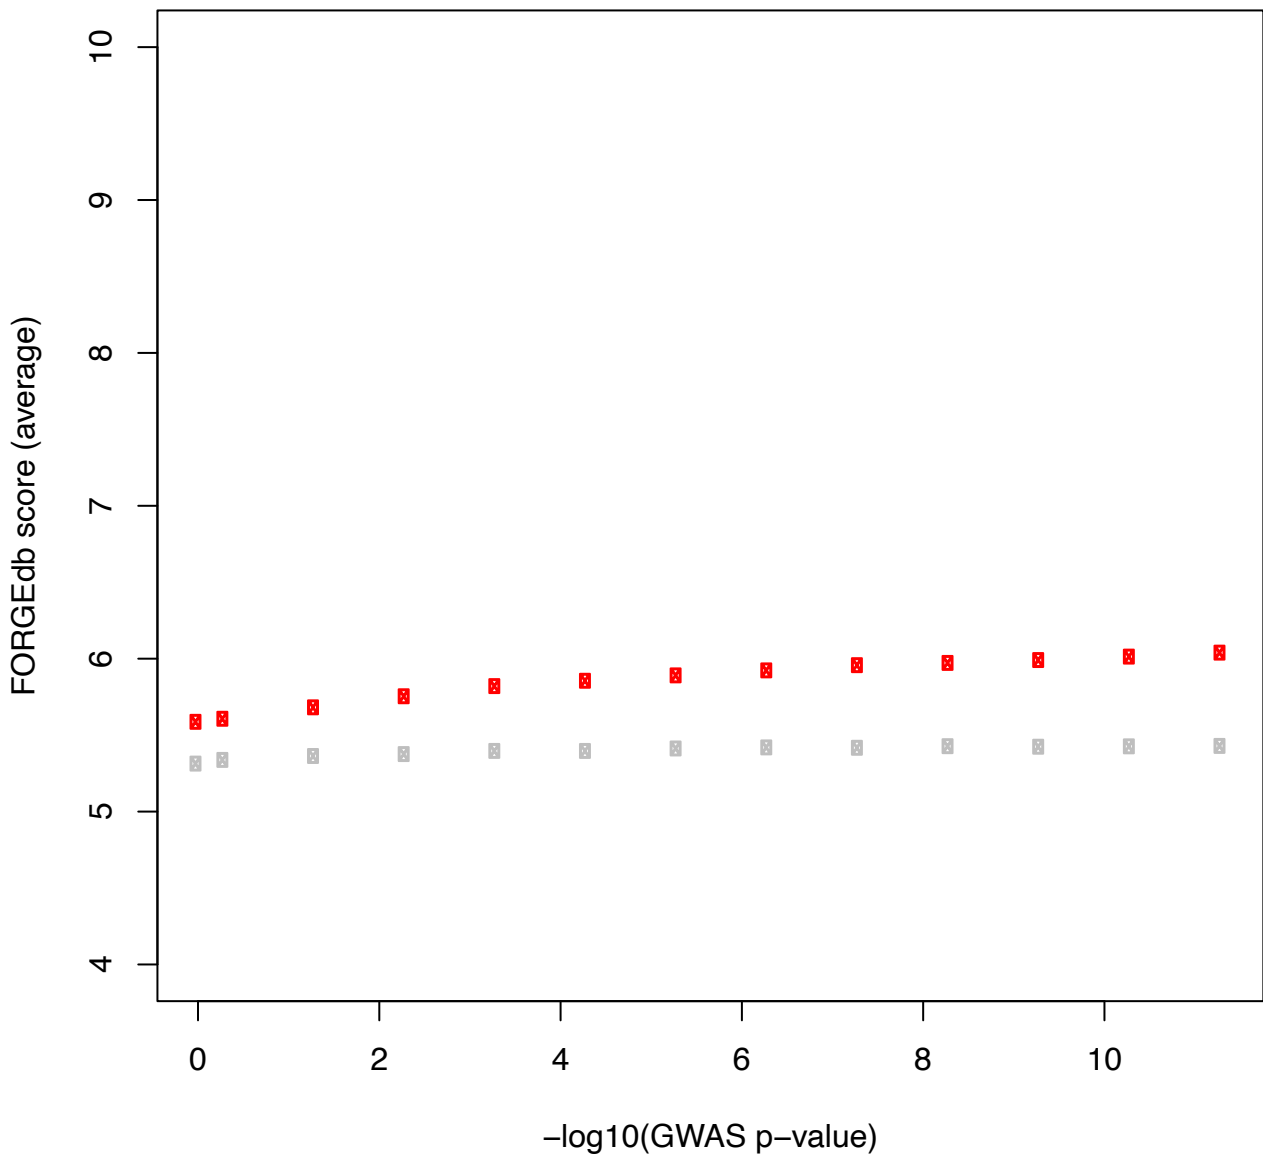

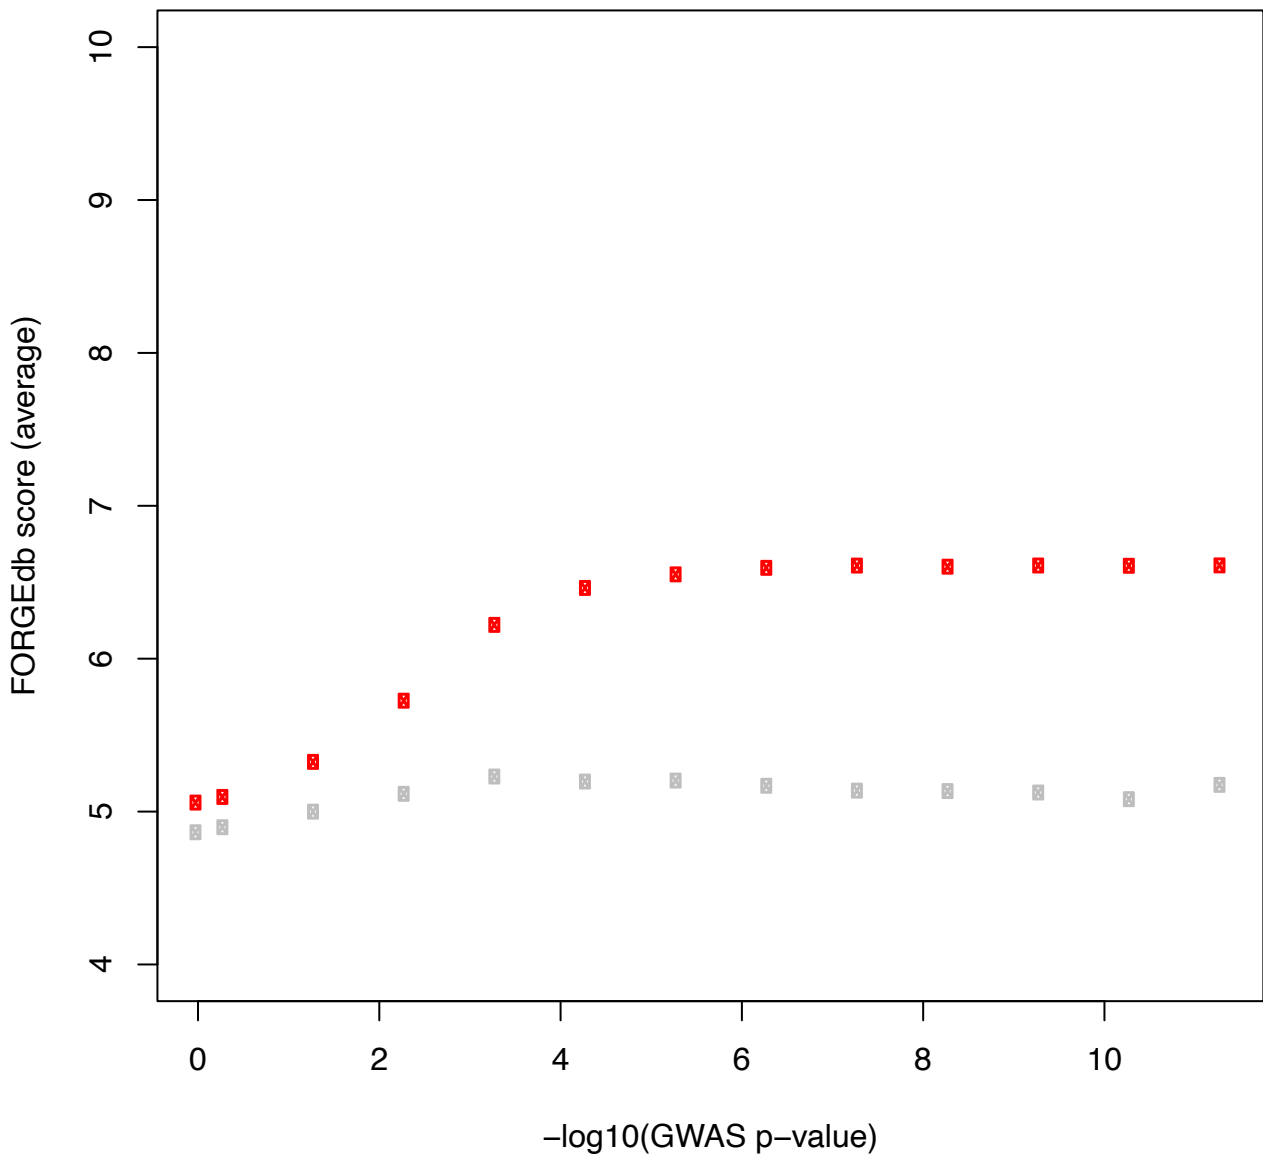



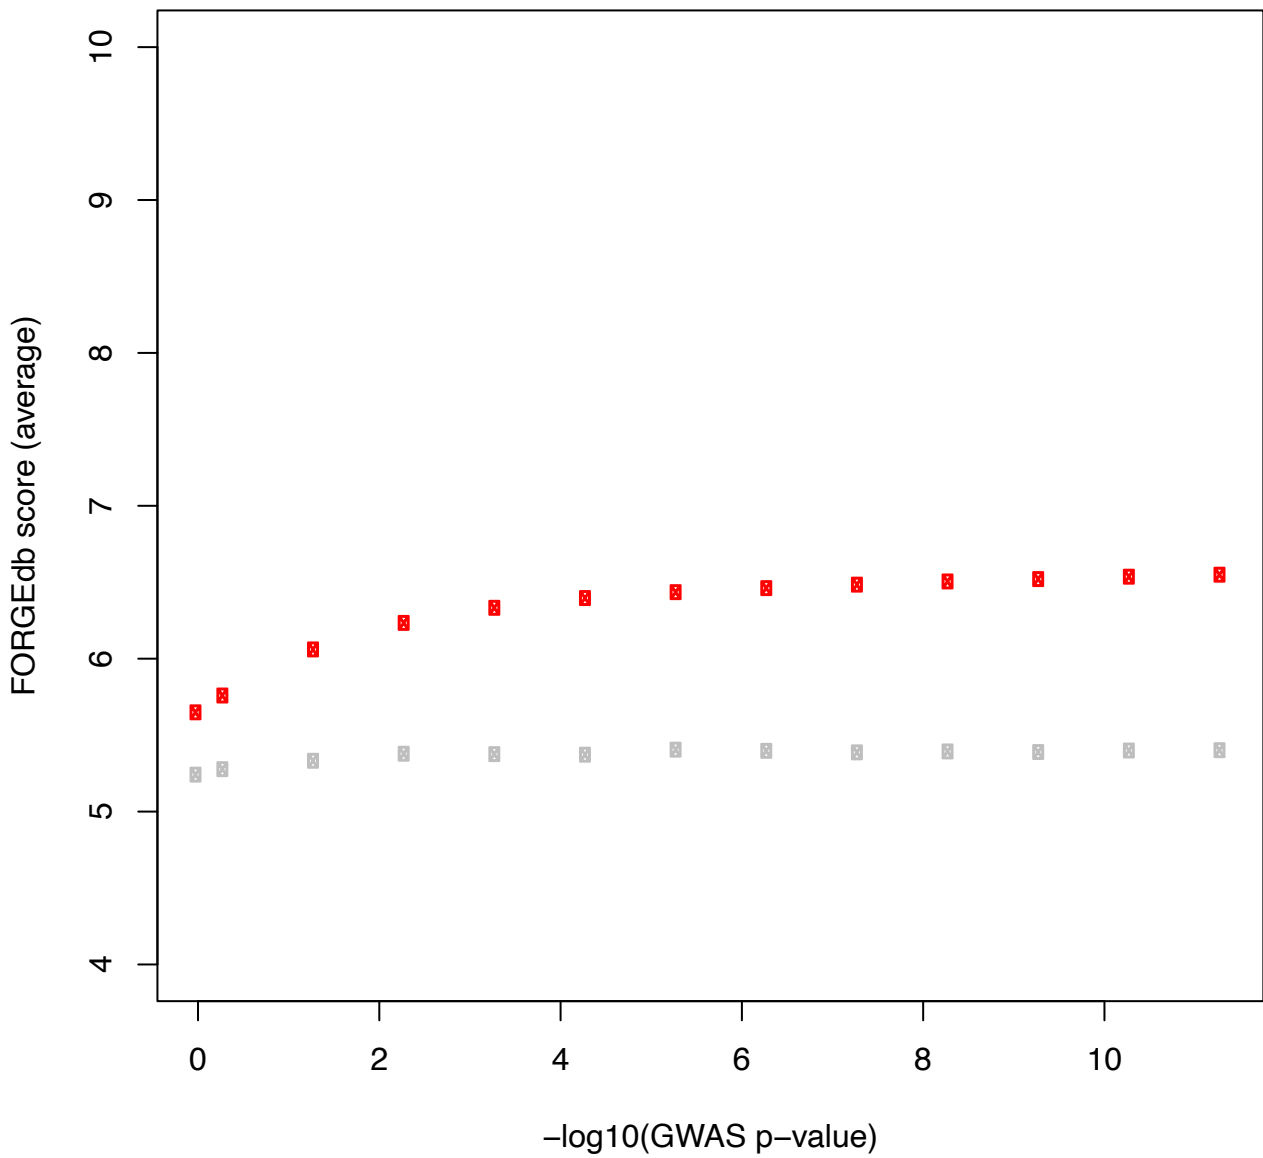

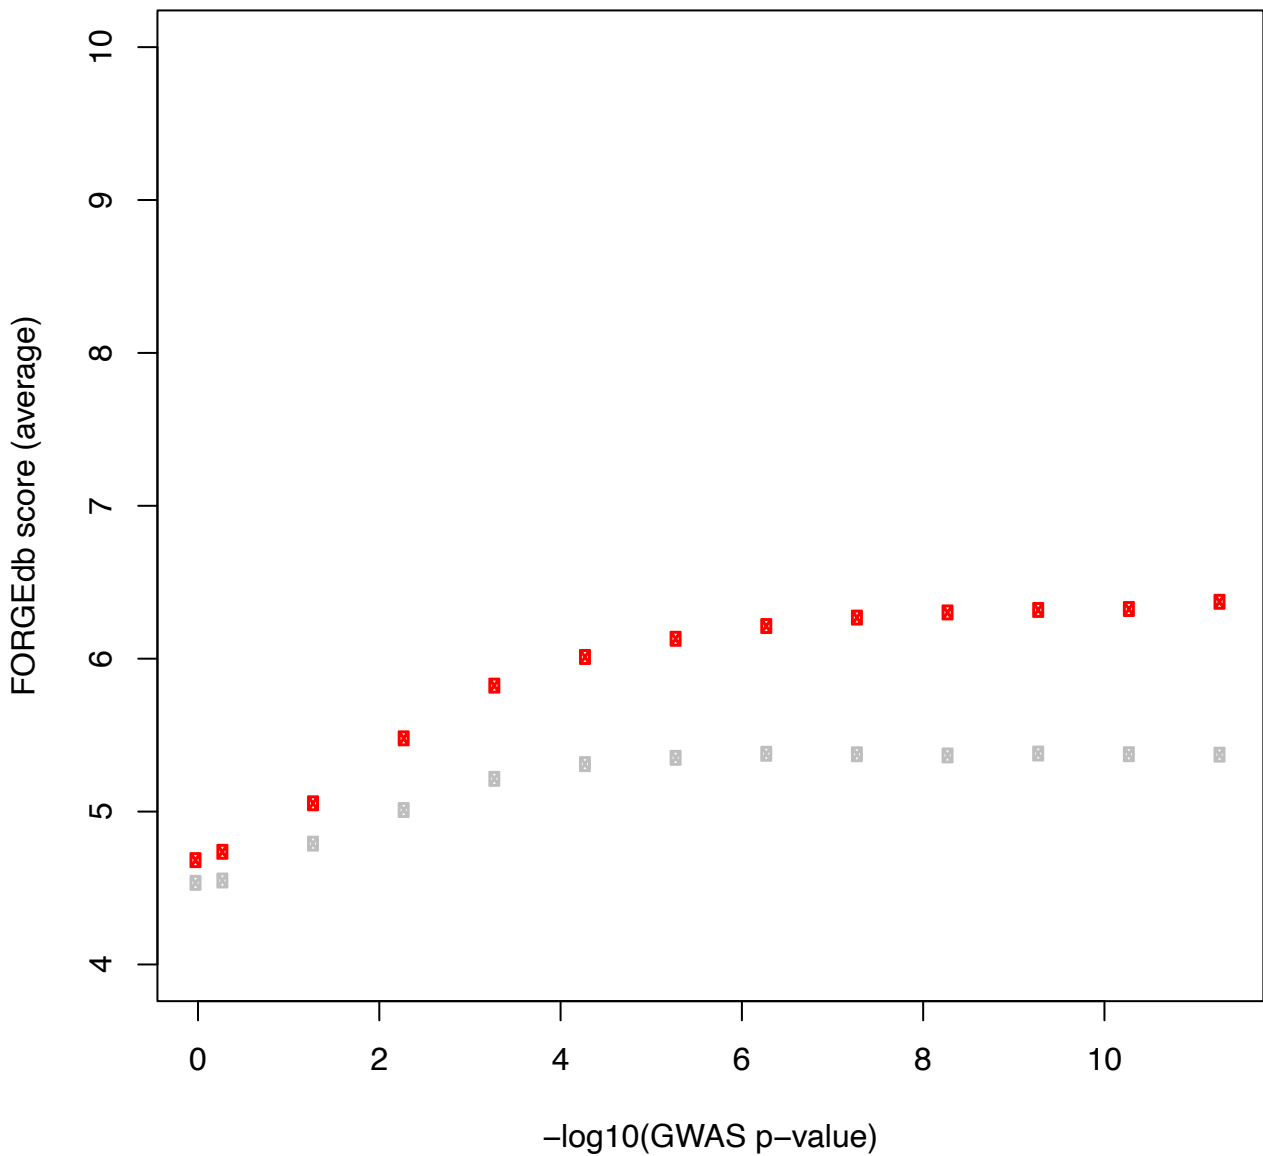

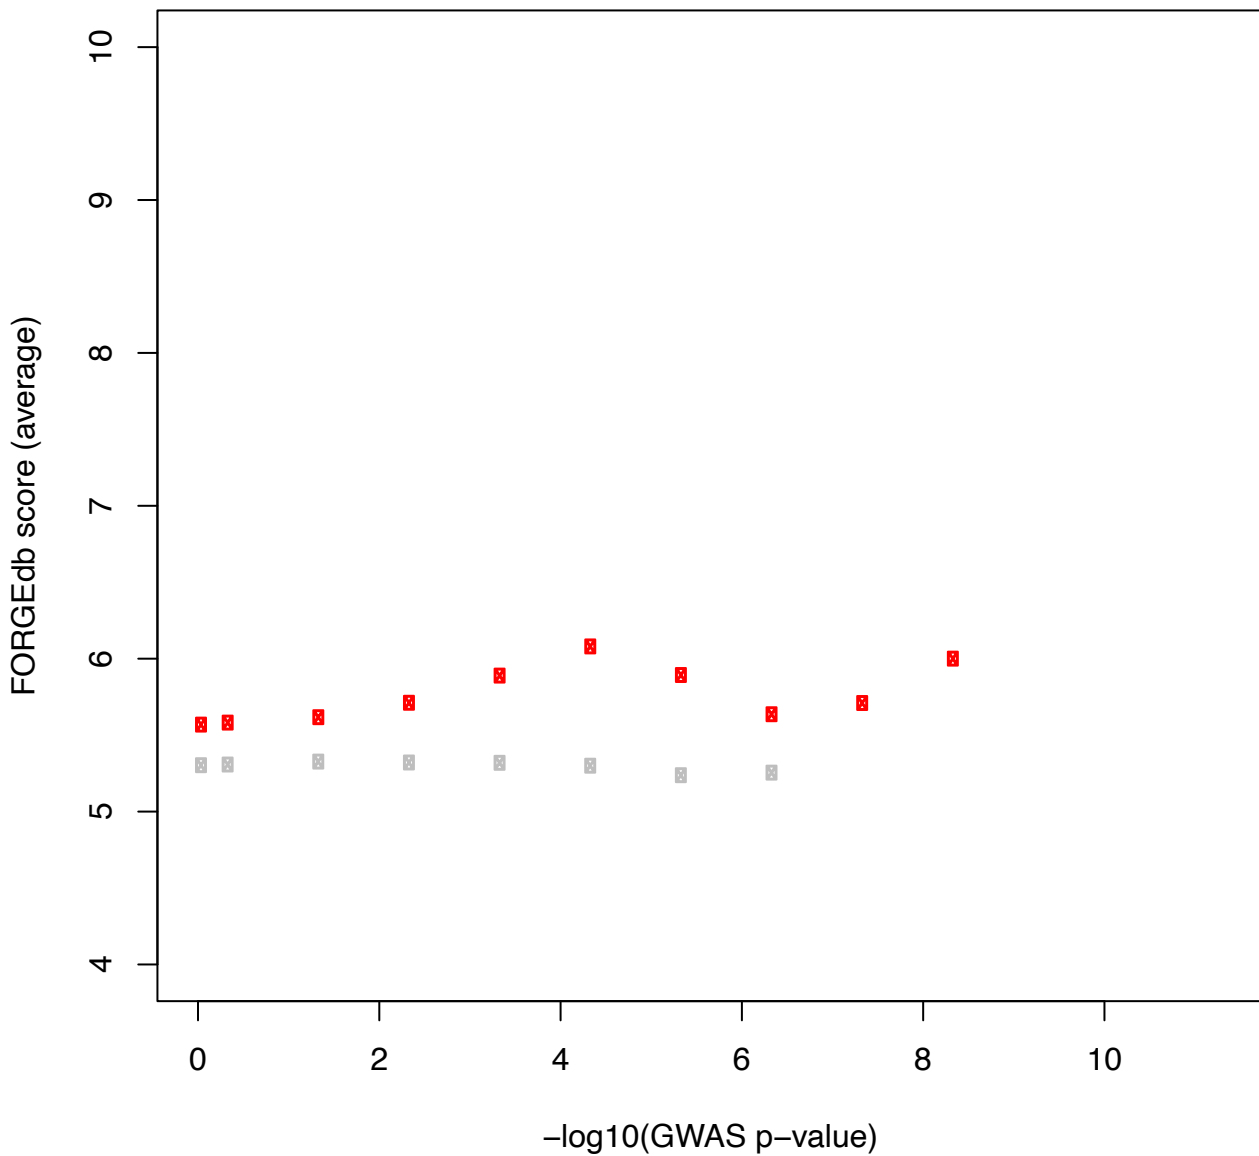

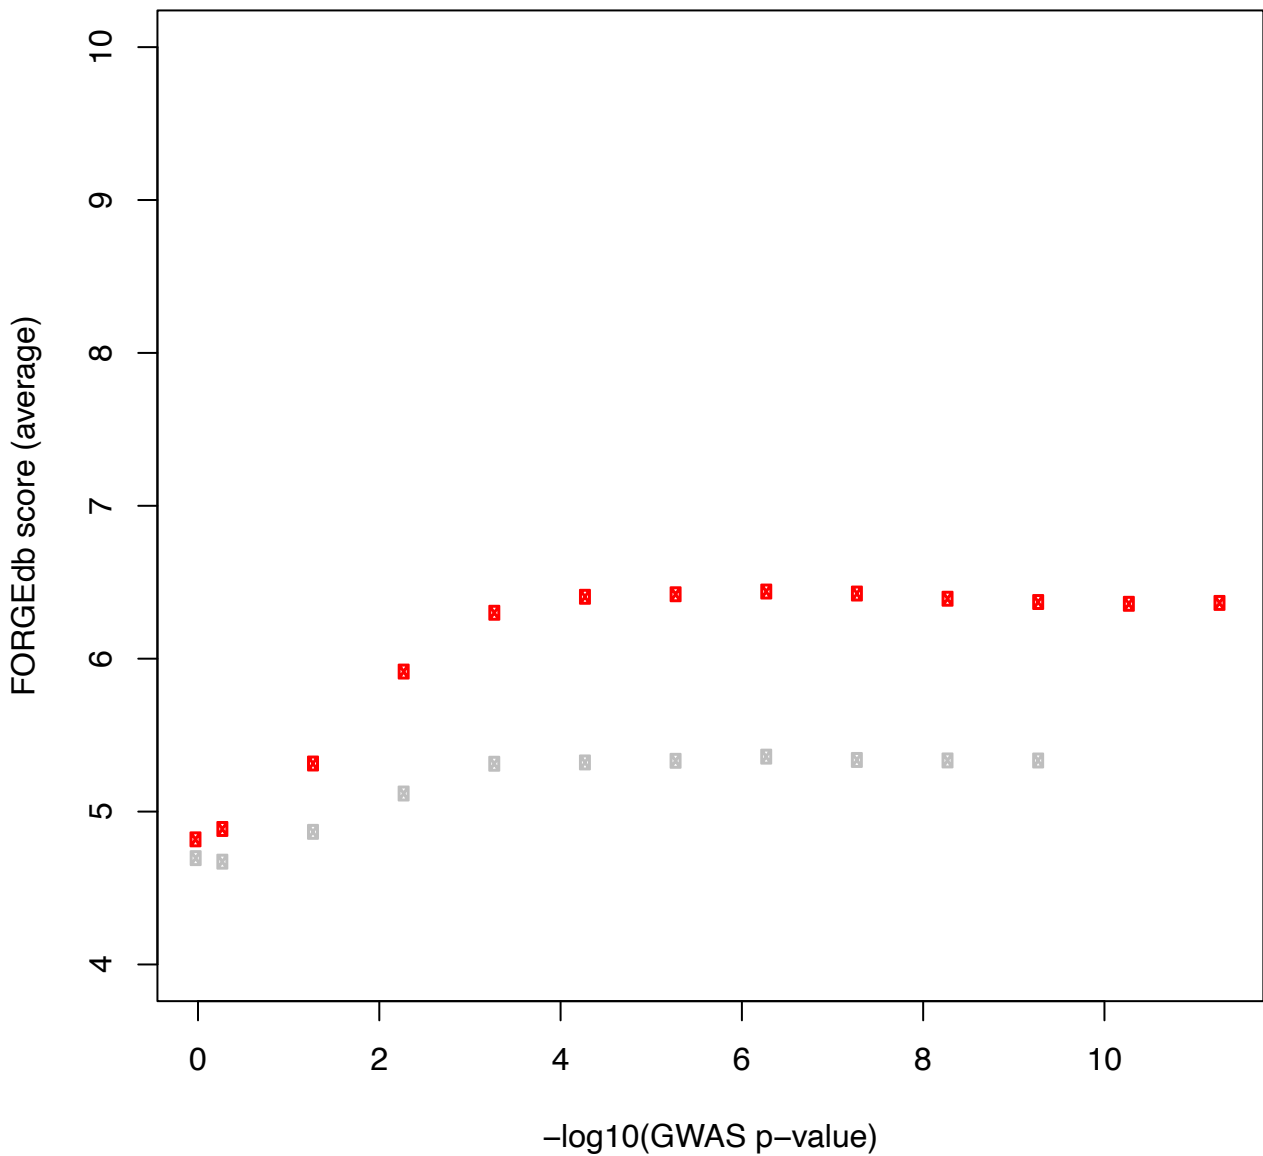

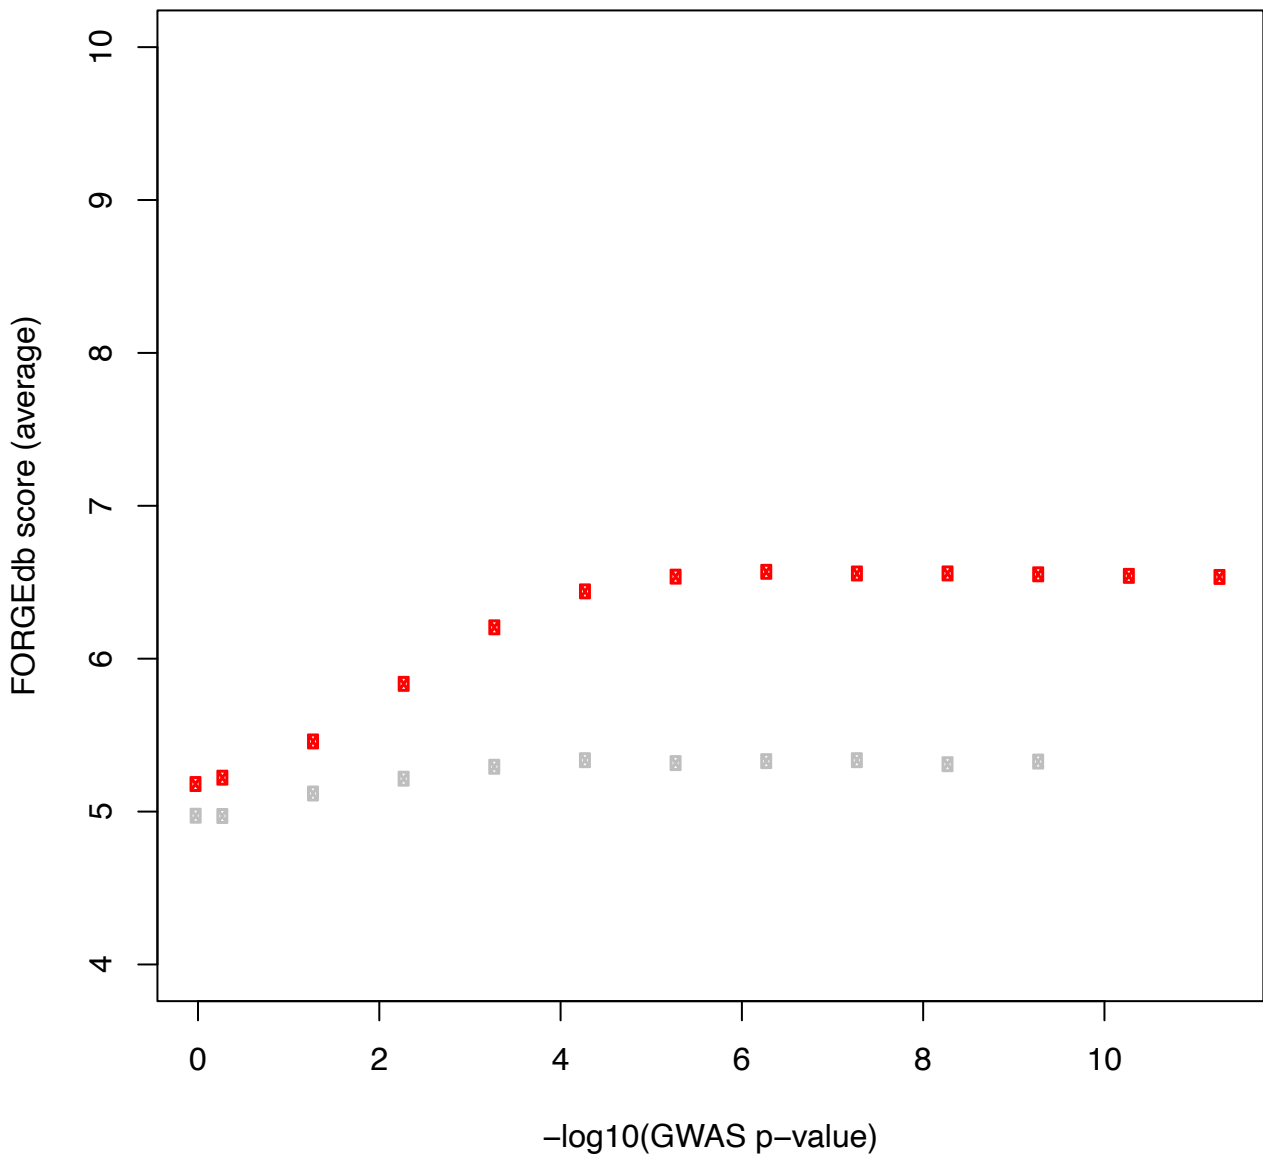

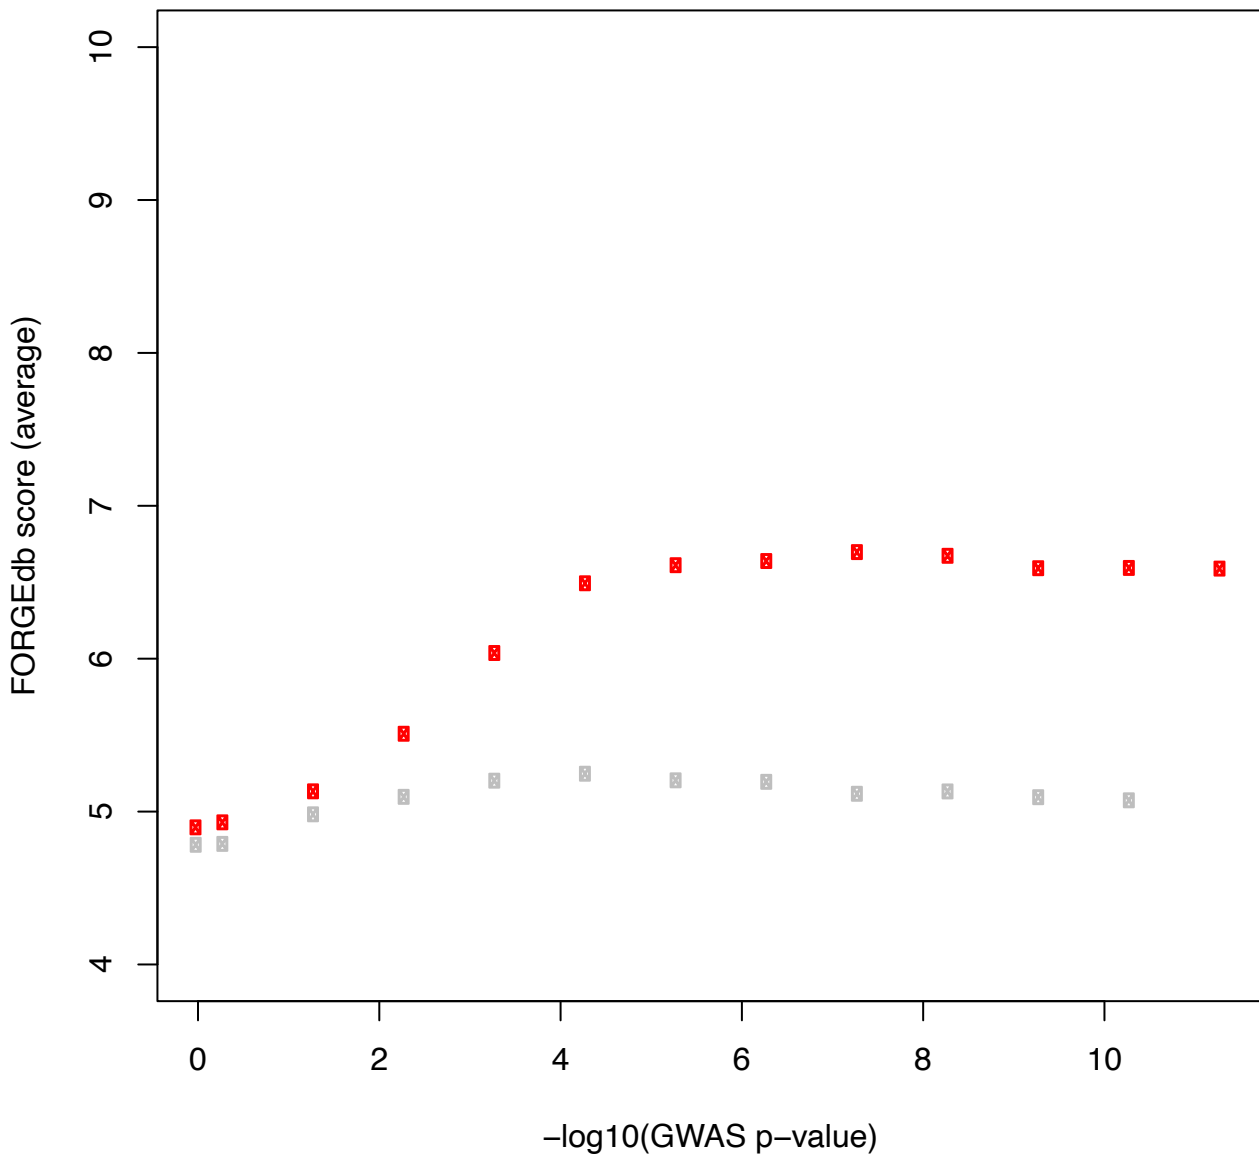

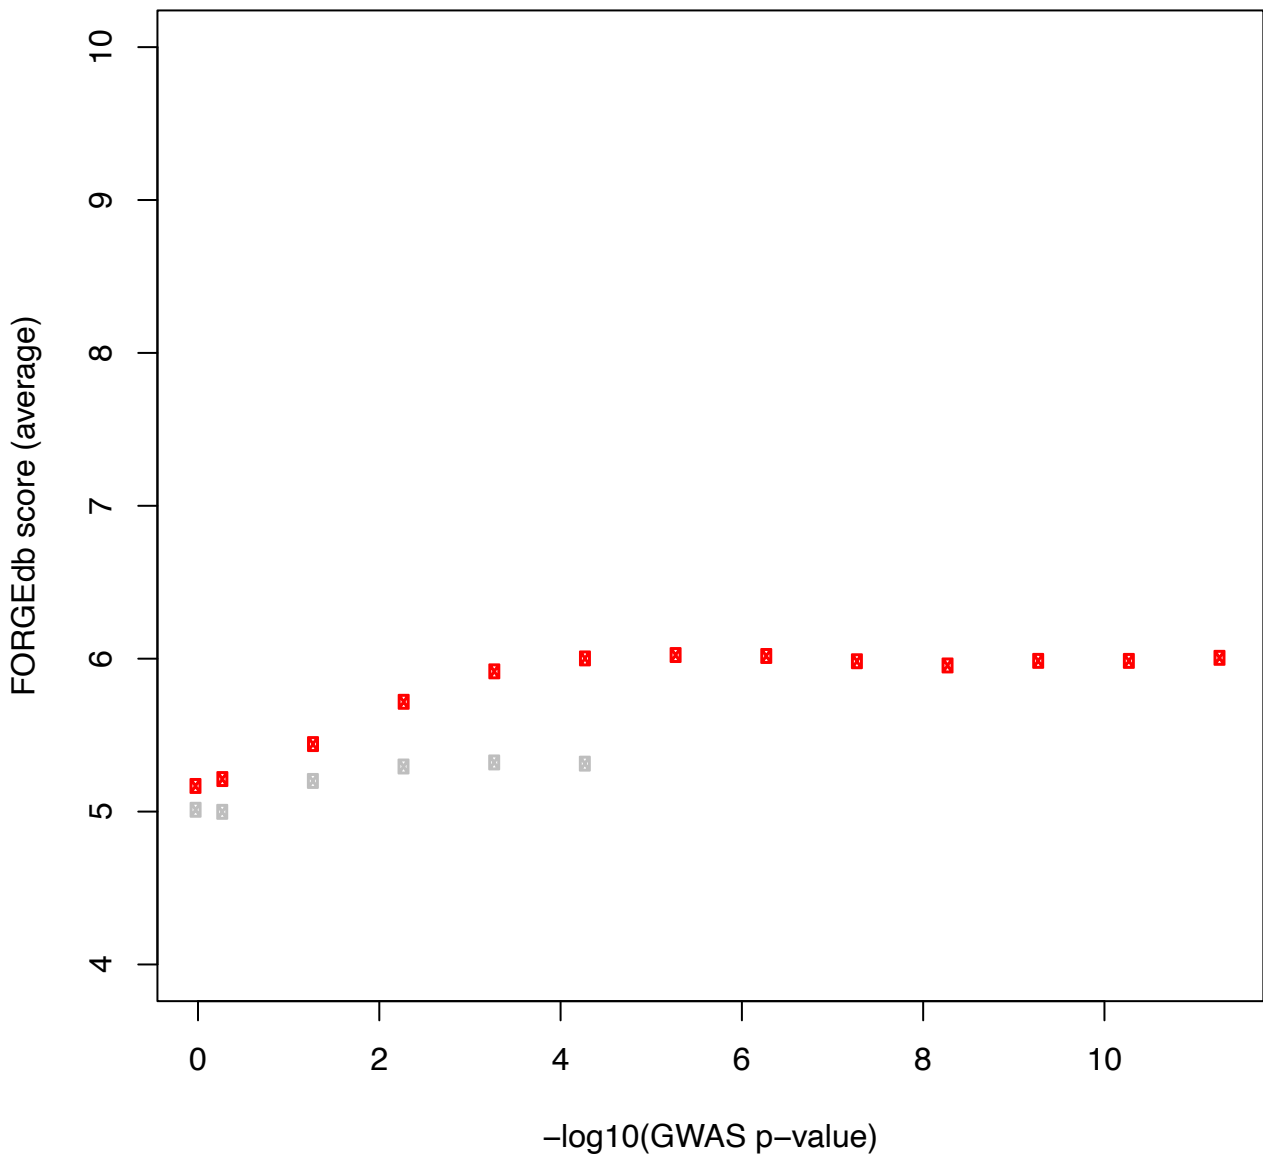

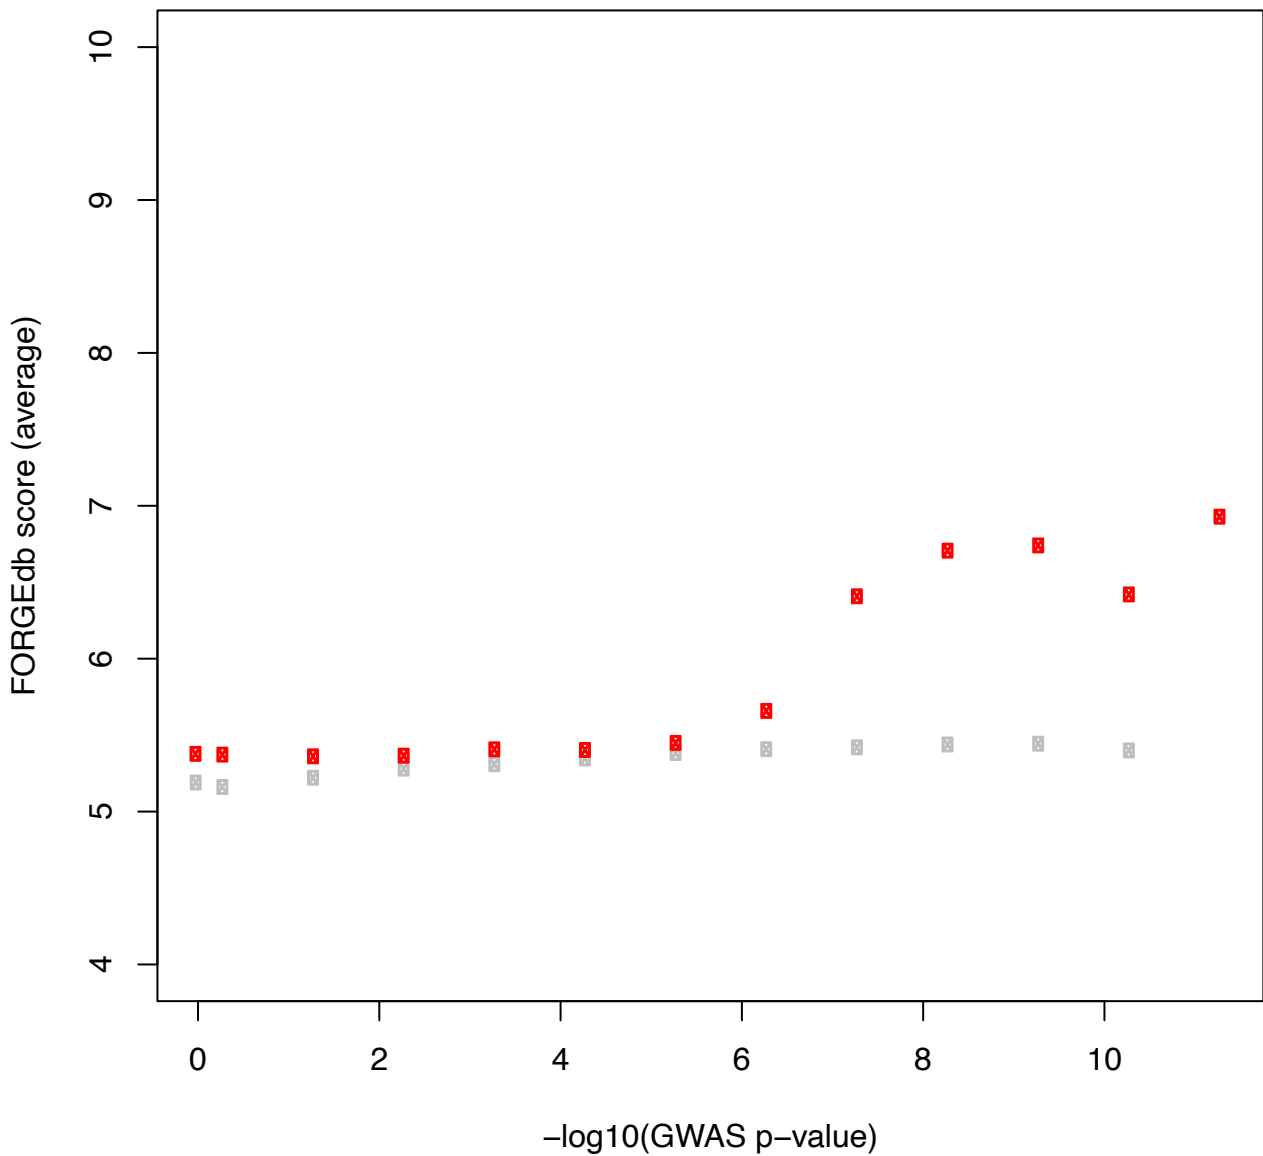



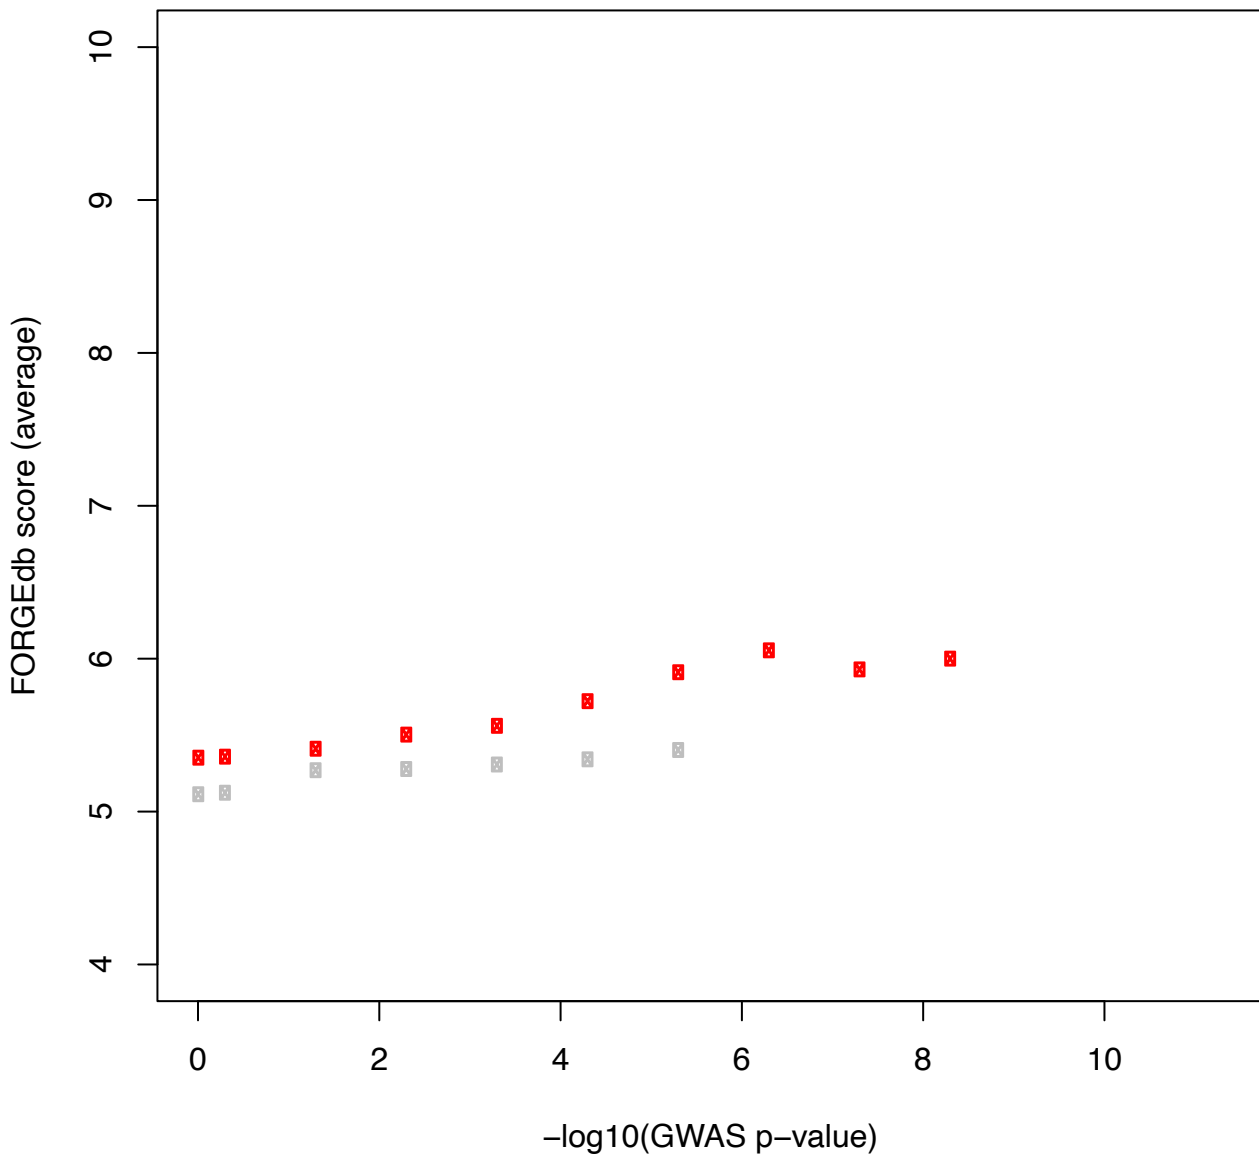

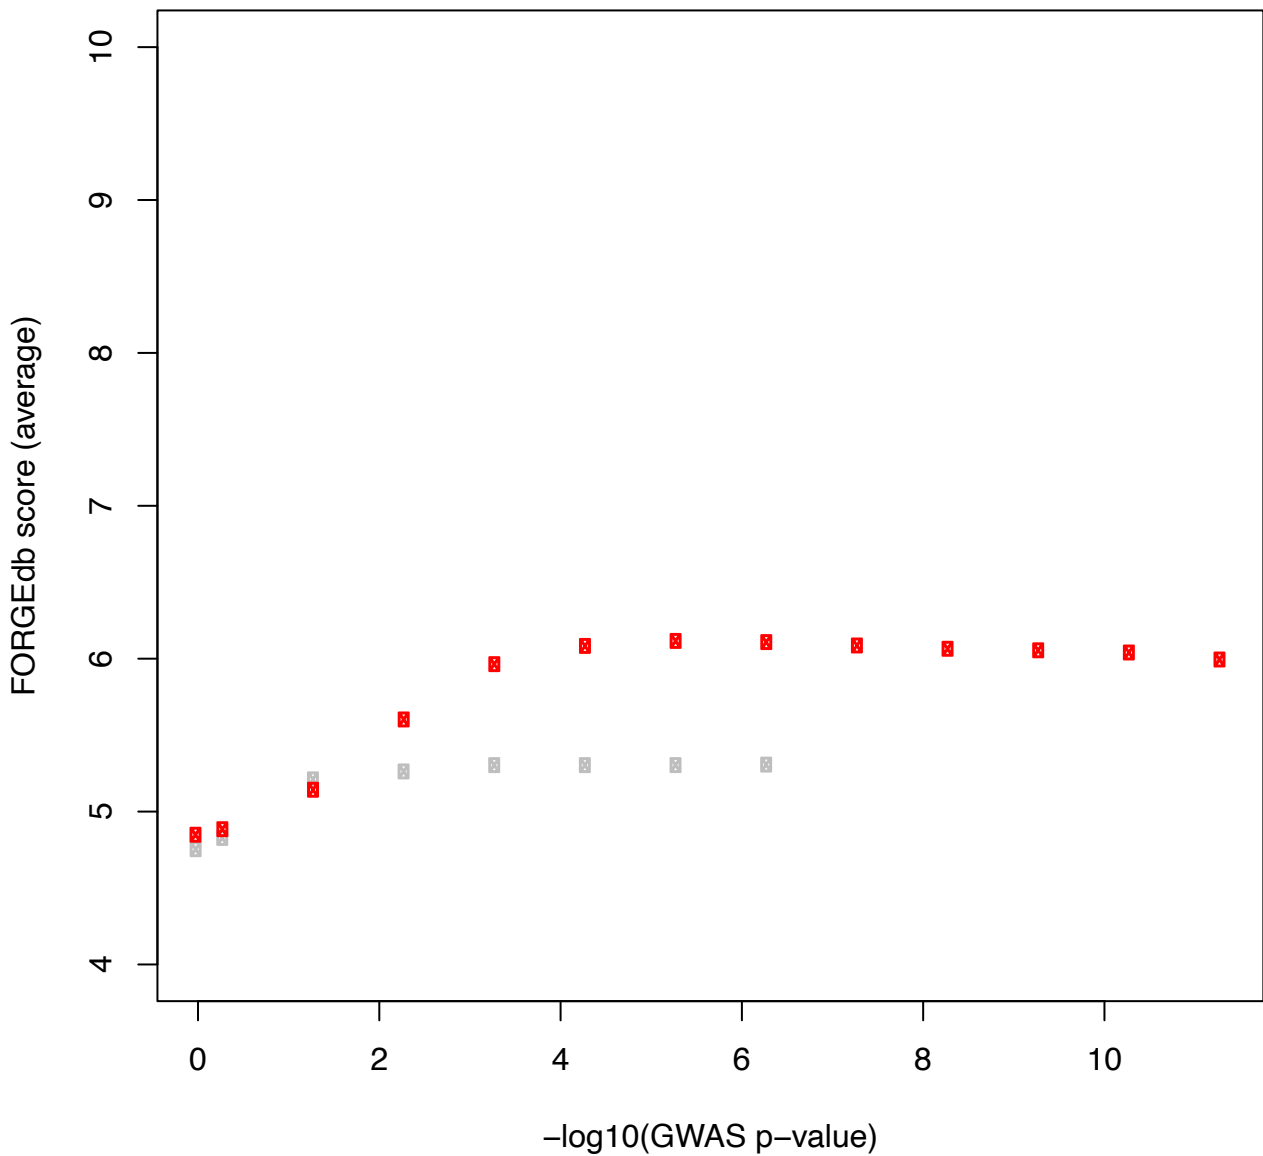

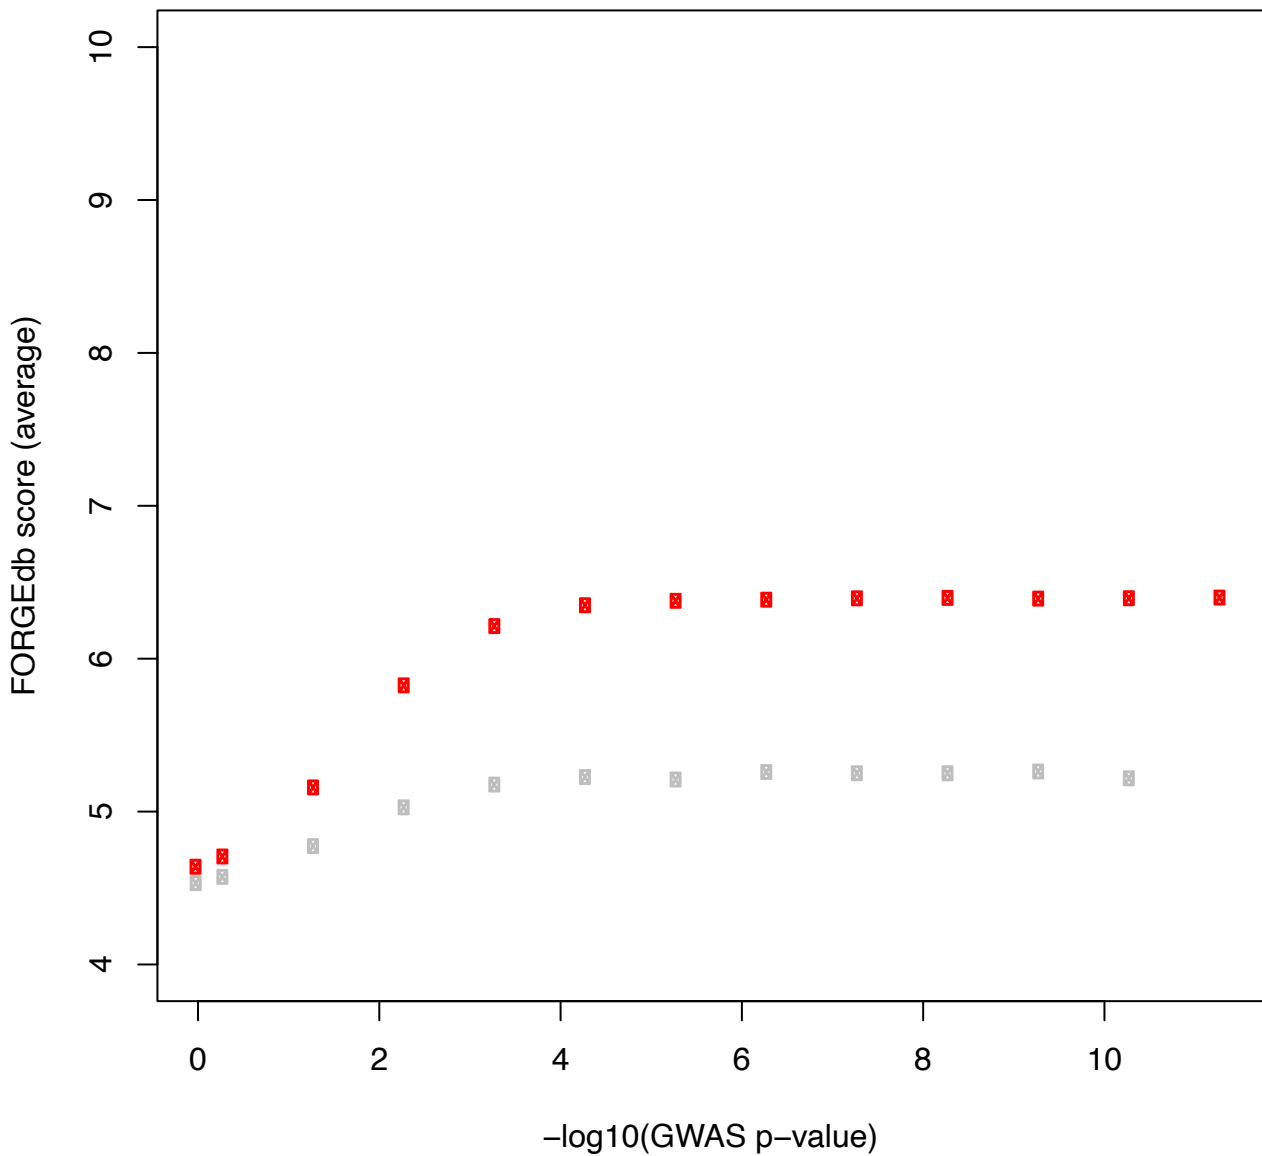

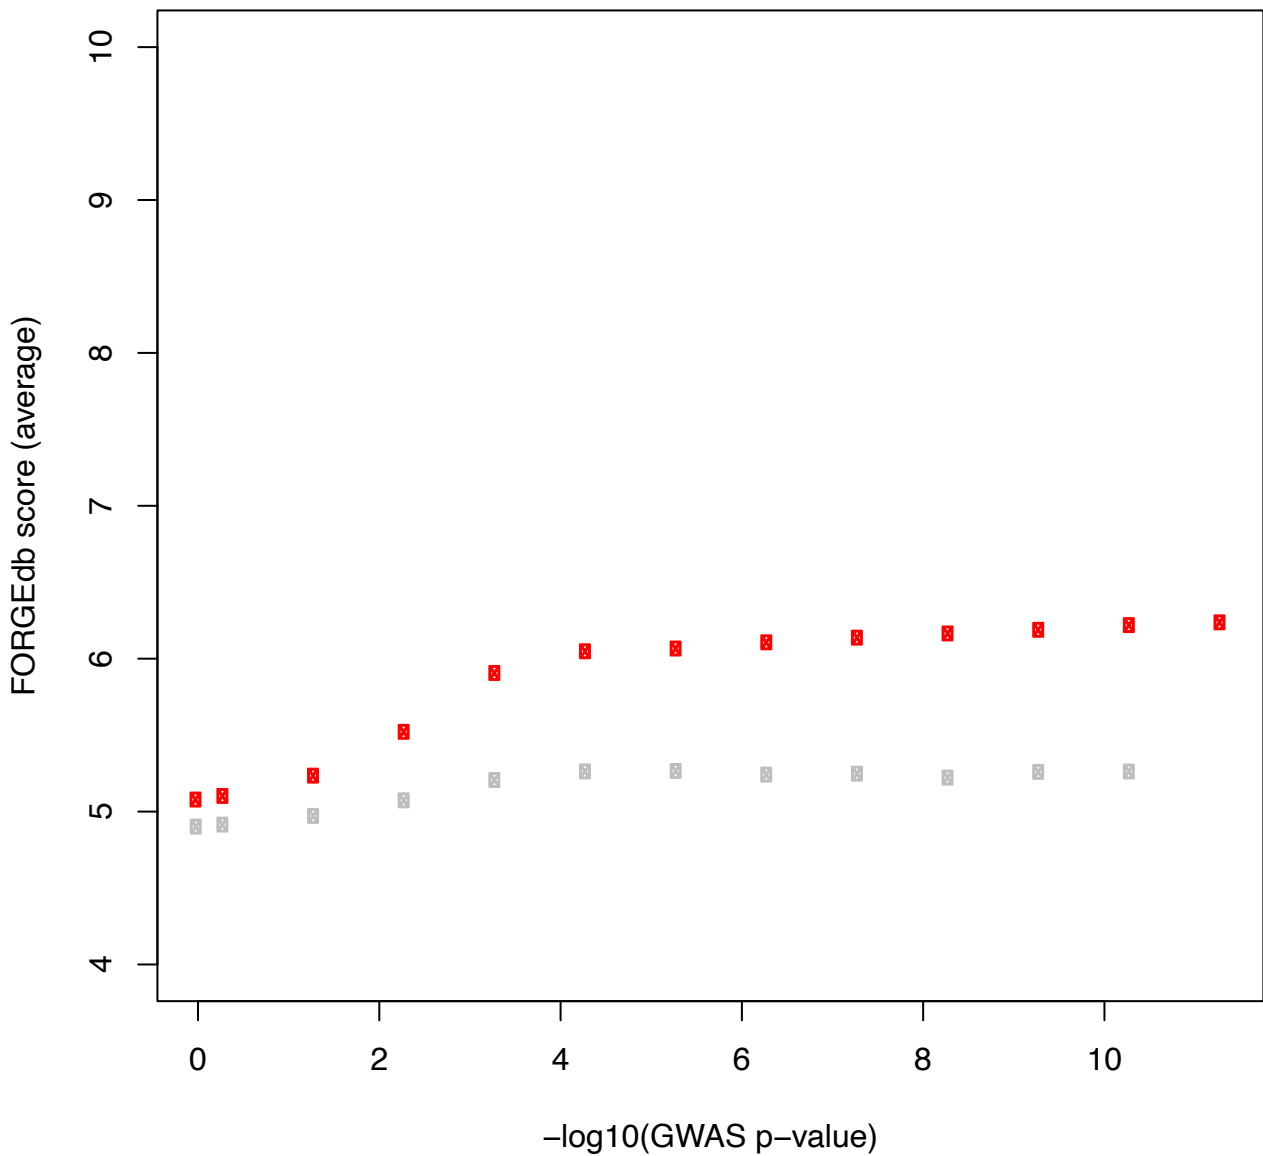

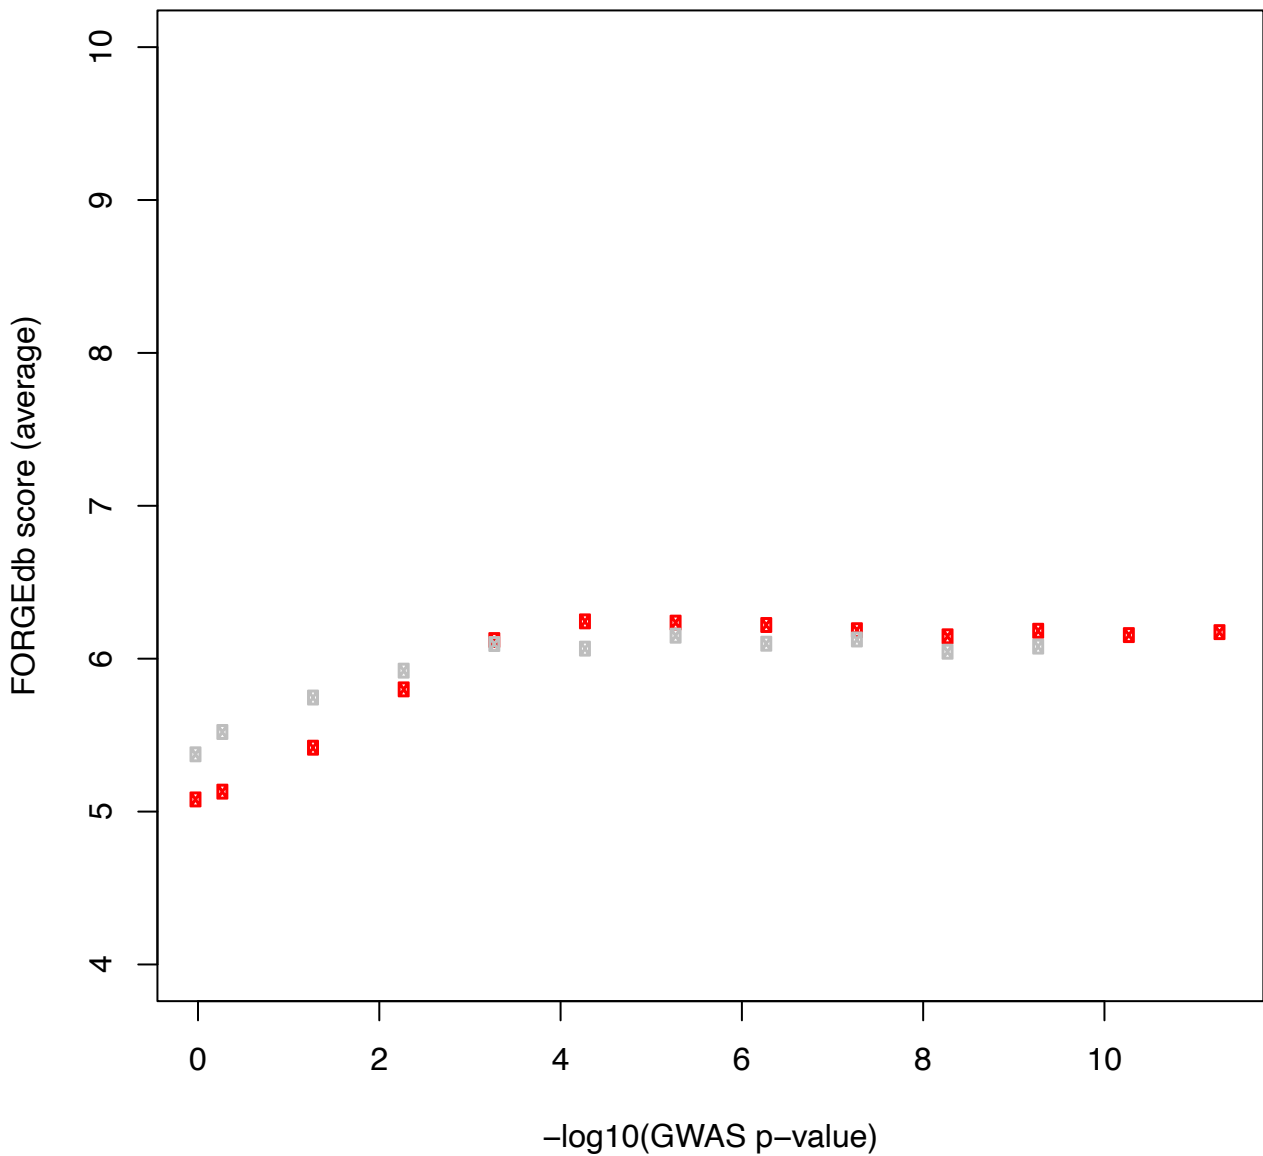

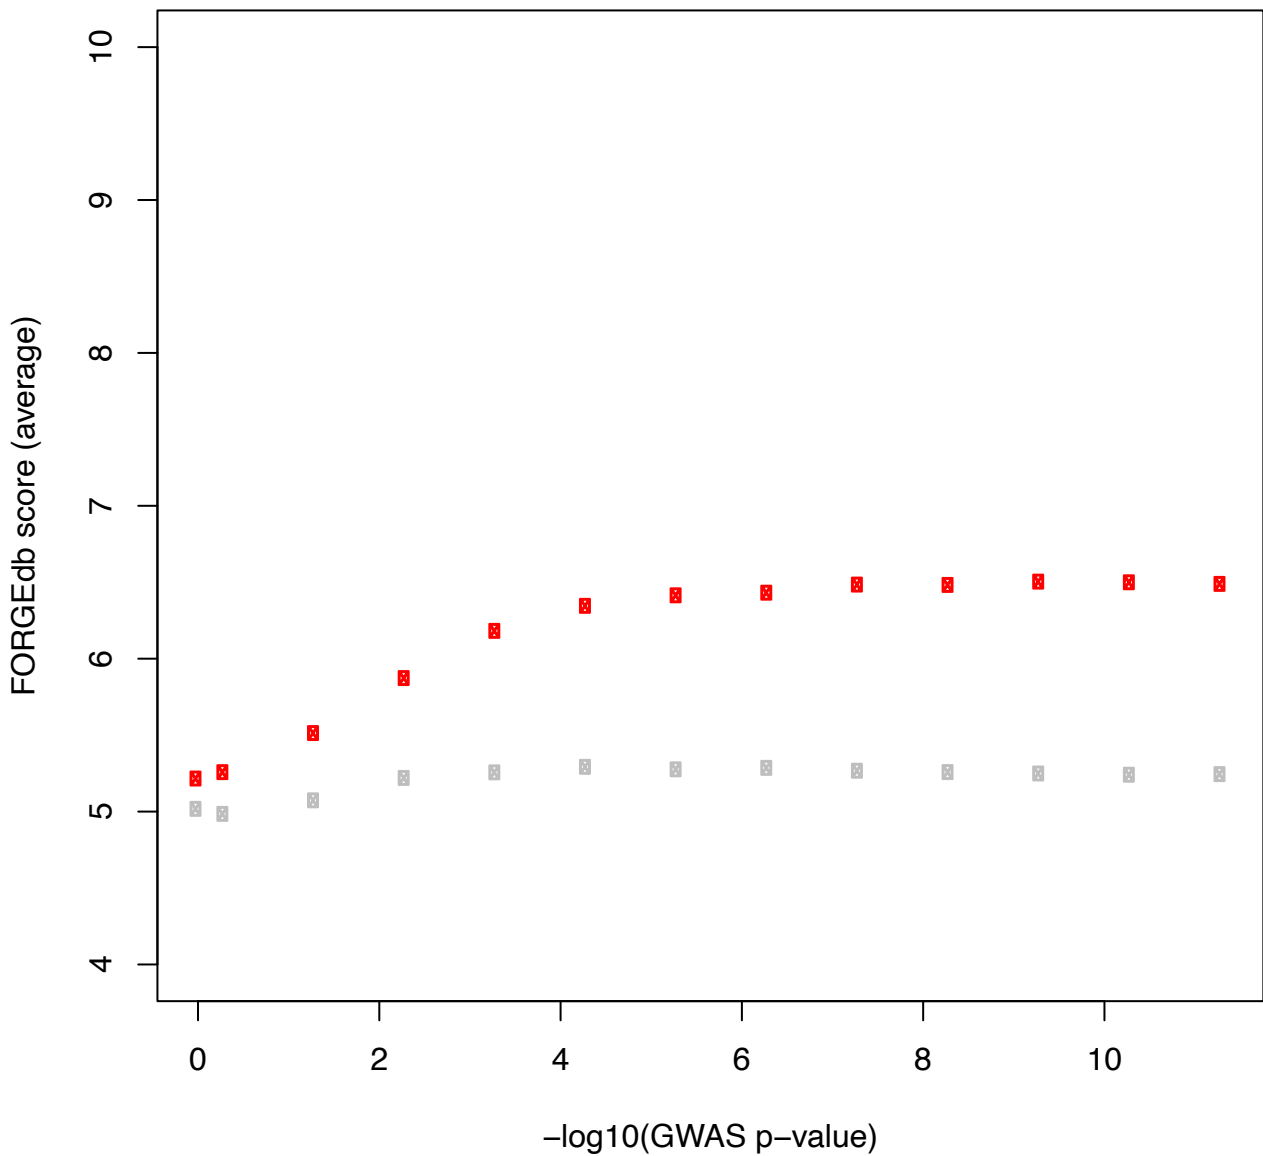

Supplement: 13059_2023_3126_MOESM1_ESM.pdf [file 13059_2023_3126_MOESM1_ESM.pdf]
